# Supplementary material for: Talaronoids A–D: four fusicoccane diterpenoids with an unprecedented tricyclic 5/8/6 ring system from the fungus Talaromyces stipitatus
Source: Royal Society of Chemistry journal article supplement (doi:10.1039/d0qo00960a), 2020-01-01
Supplement: d0qo00960a1.pdf [file d0qo00960a1.pdf]

## Supporting Information

### **Talaronoids A–D: Four Diterpenoids with an unprecedented Tricyclic 5/8/6 Ring System from the Fungus *Talaromyces stipitatus***

Mi Zhang,<sup>†,§</sup> Shan Yan,<sup>†,§</sup> Yu Liang,<sup>†</sup> Meijia Zheng,<sup>†</sup> Zhaodi Wu,<sup>‡</sup> Yi Zang,<sup>†</sup> Muyuan Yu,<sup>†</sup> Weiguang Sun,<sup>†</sup>  
Junjun Liu,<sup>†</sup> Ying Ye,<sup>†</sup> Jianping Wang,<sup>†</sup> Chunmei Chen,<sup>\*,†</sup> Hucheng Zhu,<sup>\*,†</sup> and Yonghui Zhang<sup>\*,†</sup>

<sup>†</sup>Hubei Key Laboratory of Natural Medicinal Chemistry and Resource Evaluation, School of Pharmacy, Tongji Medical College, Huazhong University of Science and Technology, Wuhan 430030, People's Republic of China

<sup>‡</sup>The Second Affiliated Hospital, Guangzhou University of Chinese Medicine, Guangzhou, Guangdong, 510120, People's Republic of China

# Content

|                                                                                                                         |    |
|-------------------------------------------------------------------------------------------------------------------------|----|
| <b>Experimental section</b> .....                                                                                       | 1  |
| <b>Detailed computational procedures</b> .....                                                                          | 4  |
| <b>The Molecular docking assays</b> .....                                                                               | 9  |
| <b>Figure S1.</b> <sup>1</sup> H NMR spectrum of talaronid A ( <b>1</b> ) in CD <sub>3</sub> OD.....                    | 10 |
| <b>Figure S2.</b> <sup>13</sup> C NMR spectrum of talaronid A ( <b>1</b> ) in CD <sub>3</sub> OD .....                  | 10 |
| <b>Figure S3.</b> DEPT spectrum of talaronid A ( <b>1</b> ) in CD <sub>3</sub> OD .....                                 | 11 |
| <b>Figure S4.</b> HSQC spectrum of talaronid A ( <b>1</b> ) in CD <sub>3</sub> OD .....                                 | 11 |
| <b>Figure S5</b> <sup>1</sup> H- <sup>1</sup> H COSY spectrum of talaronid A ( <b>1</b> ) in CD <sub>3</sub> OD.....    | 12 |
| <b>Figure S6.</b> HMBC spectrum of talaronid A ( <b>1</b> ) in CD <sub>3</sub> OD .....                                 | 12 |
| <b>Figure S7.</b> NOESY spectrum of talaronid A ( <b>1</b> ) in CD <sub>3</sub> OD.....                                 | 13 |
| <b>Figure S8.</b> (+) ESI-MS spectrum of talaronid A ( <b>1</b> ).....                                                  | 13 |
| <b>Figure S9.</b> IR spectrum of talaronid A ( <b>1</b> ).....                                                          | 14 |
| <b>Figure S10.</b> UV spectrum of talaronid A ( <b>1</b> ).....                                                         | 14 |
| <b>Figure S11.</b> <sup>1</sup> H NMR spectrum of talaronid B ( <b>2</b> ) in CD <sub>3</sub> OD.....                   | 15 |
| <b>Figure S12.</b> <sup>13</sup> C NMR spectrum of talaronid B ( <b>2</b> ) in CD <sub>3</sub> OD .....                 | 15 |
| <b>Figure S13.</b> DEPT spectrum of talaronid B ( <b>2</b> ) in CD <sub>3</sub> OD.....                                 | 16 |
| <b>Figure S14.</b> HSQC spectrum of talaronid B ( <b>2</b> ) in CD <sub>3</sub> OD .....                                | 16 |
| <b>Figure S15</b> <sup>1</sup> H- <sup>1</sup> H COSY spectrum of talaronid B ( <b>2</b> ) in CD <sub>3</sub> OD .....  | 17 |
| <b>Figure S16.</b> HMBC spectrum of talaronid B ( <b>2</b> ) in CD <sub>3</sub> OD.....                                 | 17 |
| <b>Figure S17.</b> NOESY spectrum of talaronid B ( <b>2</b> ) in CD <sub>3</sub> OD.....                                | 18 |
| <b>Figure S18.</b> (+) ESI-MS spectrum of talaronid B ( <b>2</b> ) .....                                                | 18 |
| <b>Figure S19.</b> IR spectrum of talaronid B ( <b>2</b> ) .....                                                        | 19 |
| <b>Figure S20.</b> UV spectrum of talaronid B ( <b>2</b> ).....                                                         | 19 |
| <b>Figure S21.</b> <sup>1</sup> H NMR spectrum of talaronid C ( <b>3</b> ) in CD <sub>3</sub> OD .....                  | 20 |
| <b>Figure S22.</b> <sup>13</sup> C NMR spectrum of talaronid C ( <b>3</b> ) in CD <sub>3</sub> OD .....                 | 21 |
| <b>Figure S23.</b> DEPT spectrum of talaronid C ( <b>3</b> ) in CD <sub>3</sub> OD.....                                 | 21 |
| <b>Figure S24.</b> HSQC spectrum of talaronid C ( <b>3</b> ) in CD <sub>3</sub> OD .....                                | 22 |
| <b>Figure S25.</b> <sup>1</sup> H- <sup>1</sup> H COSY spectrum of talaronid C ( <b>3</b> ) in CD <sub>3</sub> OD ..... | 22 |

|                                                                                                                         |    |
|-------------------------------------------------------------------------------------------------------------------------|----|
| <b>Figure S26.</b> HMBC spectrum of talaronid C ( <b>3</b> ) in CD <sub>3</sub> OD.....                                 | 23 |
| <b>Figure S27.</b> NOESY spectrum of talaronid C ( <b>3</b> ) in CD <sub>3</sub> OD.....                                | 23 |
| <b>Figure S28.</b> (+) ESI-MS spectrum of talaronid C ( <b>3</b> ) .....                                                | 24 |
| <b>Figure S29.</b> IR spectrum of talaronid C ( <b>3</b> ) .....                                                        | 24 |
| <b>Figure S30.</b> UV spectrum of talaronid C ( <b>3</b> ).....                                                         | 25 |
| <b>Figure S31.</b> <sup>1</sup> H NMR spectrum of talaronid D ( <b>4</b> ) in CD <sub>3</sub> OD .....                  | 25 |
| <b>Figure S32.</b> <sup>13</sup> C NMR spectrum of talaronid C ( <b>3</b> ) in CD <sub>3</sub> OD .....                 | 26 |
| <b>Figure S33.</b> DEPT spectrum of talaronid D ( <b>4</b> ) in CD <sub>3</sub> OD.....                                 | 26 |
| <b>Figure S34.</b> HSQC spectrum of talaronid D ( <b>4</b> ) in CD <sub>3</sub> OD.....                                 | 27 |
| <b>Figure S35.</b> <sup>1</sup> H- <sup>1</sup> H COSY spectrum of talaronid D ( <b>4</b> ) in CD <sub>3</sub> OD ..... | 27 |
| <b>Figure S36.</b> HMBC spectrum of talaronid D ( <b>4</b> ) in CD <sub>3</sub> OD.....                                 | 28 |
| <b>Figure S37.</b> NOESY spectrum of talaronid D ( <b>4</b> ) in CD <sub>3</sub> OD .....                               | 28 |
| <b>Figure S38.</b> (+) ESI-MS spectrum of talaronid D ( <b>4</b> ) .....                                                | 29 |
| <b>Figure S39.</b> IR spectrum of talaronid D ( <b>4</b> ) .....                                                        | 29 |
| <b>Figure S40.</b> UV spectrum of talaronid D ( <b>4</b> ).....                                                         | 30 |

## Detailed computational procedures:

### ECD calculation for compound 1:

The conformations of **1** generated by BALLOON<sup>1,2</sup> were subjected to semiempirical PM3 quantum mechanical geometry optimizations using the Gaussian 09 program.<sup>3</sup> Duplicate conformations were identified and removed when the root-mean-square (RMS) distance was less than 0.5 Å for any two geometry-optimized conformations. The remaining conformations were further optimized at the B3LYP/6-31G(d) level in MeOH with the IEFPCM solvation model using Gaussian 09, and the duplicate conformations emerging after these calculations were removed according to the same RMS criteria above. The harmonic vibrational frequencies were calculated to confirm the stability of the final conformers. The electronic circular dichroism (ECD) spectrum were calculated for each conformer using the TDDFT methodology at the B3LYP/6-311++G(d,p)//B3LYP/6-31G(d) level with MeOH as solvent by the IEFPCM solvation model implemented in Gaussian 09 program. The ECD spectra for each conformer were simulated using a Gaussian function with a bandwidth  $\sigma$  of 0.45 eV. The spectra were combined after Boltzmann weighting according to their population contributions and UV correction was applied.<sup>4</sup>

(1) And, M. J. V.; Johnson, M. S., Generating Conformer Ensembles Using a Multiobjective Genetic Algorithm. *J. Chem. Inf. Model.* **2007**, *47*, 2462-2474.

(2) Puranen, J. S.; Vainio, M. J.; Johnson, M. S., Accurate conformation-dependent molecular electrostatic potentials for high-throughput in silico drug discovery. *J. Comput. Chem.* **2010**, *31*, 1722-1732.

(3) Frisch MJT, G. W. S., H. B.; Scuseria, G. E.; Robb, M. A.; Cheeseman, J. R.; Scalmani, G.; Barone, V.; Mennucci, B.; Petersson, G. A.; Nakatsuji, H.; Caricato, M.; Li, X.; Hratchian, H. P.; Izmaylov, A. F.; Bloino, J.; Zheng, G.; Sonnenberg, J. L.; Hada, M.; Ehara, M.; Toyota, K.; Fukuda, R.; Hasegawa, J.; Ishida, M.; Nakajima, T.; Honda, Y.; Kitao, O.; Nakai, H.; Vreven, T.; Montgomery, J. A., Jr.; Peralta, J. E.; Ogliaro, F.; Bearpark, M.; Heyd, J. J.; Brothers, E.; Kudin, K. N.; Staroverov, V. N.; Kobayashi, R.; Normand, J.; Raghavachari, K.; Rendell, A.; Burant, J. C.; Iyengar, S. S.; Tomasi, J.;

Cossi, M.; Rega, N.; Millam, N. J.; Klene, M.; Knox, J. E.; Cross, J. B.; Bakken, V.; Adamo, C.; Jaramillo, J.; Gomperts, R.; Stratmann, R. E.; Yazyev, O.; Austin, A. J.; Cammi, R.; Pomelli, C.; Ochterski, J. W.; Martin, R. L.; Morokuma, K.; Zakrzewski, V. G.; Voth, G. A.; Salvador, P.; Dannenberg, J. J.; Dapprich, S.; Daniels, A. D.; Farkas, Ö.; Foresman, J. B.; Ortiz, J. V.; Cioslowski, J.; Fox, D. J., **2009**, Gaussian 09, Revision D 01, Gaussian, Inc, Wallingford, CT.

(4) Zhu, H. J., Organic Stereochemistry: Experimental and Computational Methods. Wiley-VCH Verlag GmbH & Co. KGaA, Weinheim: Germany, **2015**.

**Table S1.** Important thermodynamic parameters (a.u.) and Boltzmann distribution of the optimized compound **3** at B3LYP/6-31G(d) level in methanol.

| Conformation | Internal Energy | Ratio  |
|--------------|-----------------|--------|
| 1-A-a        | -1006.79        | 90.49% |
| 1-A-b        | -1006.79        | 7.84%  |
| 1-A-c        | -1006.79        | 1.62%  |

**Table S2.** Optimized coordinates of compound **1** at B3LYP/6-31G(d) level in methanol

| 1-A-a |        |        |        | 1-A-b |        |        |        |
|-------|--------|--------|--------|-------|--------|--------|--------|
| C1    | 2.243  | 1.061  | -0.038 | C1    | -2.368 | -0.733 | -0.337 |
| C2    | -0.977 | 2.056  | 1.19   | C2    | 0.829  | -2.291 | 0.222  |
| C3    | 1.29   | 0.718  | 0.845  | C3    | -1.349 | -0.799 | 0.537  |
| C4    | -1.821 | 1.488  | 0.309  | C4    | 1.68   | -1.482 | -0.427 |
| C5    | 0.483  | 1.818  | 1.517  | C5    | -0.599 | -2.113 | 0.693  |
| C6    | 3.245  | -1.233 | -0.004 | C6    | -3.2   | 1.418  | 0.631  |
| C7    | 1.833  | -1.702 | 0.36   | C7    | -1.741 | 1.649  | 1.033  |
| C8    | -2.489 | -0.039 | -1.69  | C8    | 2.351  | 0.641  | -1.798 |
| C9    | -0.428 | -1.108 | 1.377  | C9    | 0.519  | 0.615  | 1.584  |

|     |        |        |        |     |        |        |        |
|-----|--------|--------|--------|-----|--------|--------|--------|
| C10 | -1.439 | 0.333  | -0.617 | C10 | 1.341  | -0.054 | -0.852 |
| C11 | -1.242 | -1.055 | 0.082  | C11 | 1.256  | 1.005  | 0.299  |
| C12 | -2.67  | -1.675 | 0.174  | C12 | 2.712  | 1.523  | 0.499  |
| C13 | -3.424 | -1.099 | -1.056 | C13 | 3.384  | 1.371  | -0.904 |
| C14 | 3.229  | 0.134  | -0.722 | C14 | -3.324 | 0.424  | -0.544 |
| C15 | 1.082  | -0.73  | 1.304  | C15 | -1.015 | 0.358  | 1.487  |
| C16 | -3.422 | -1.423 | 1.489  | C16 | 3.522  | 0.833  | 1.607  |
| C17 | 2.855  | -0.018 | -2.216 | C17 | -3.038 | 1.111  | -1.899 |
| C18 | 1.648  | -0.886 | 2.741  | C18 | -1.495 | -0.011 | 2.917  |
| C19 | -3.196 | 2.123  | 0.195  | C19 | 3.041  | -2.042 | -0.834 |
| C20 | 4.618  | 0.795  | -0.619 | C20 | -4.782 | -0.106 | -0.556 |
| O1  | -3.728 | -2.177 | -1.955 | O1  | 3.846  | 2.601  | -1.47  |
| O2  | -3.329 | 2.942  | -0.98  | O2  | 3.375  | -3.305 | -0.267 |
| O3  | 5.595  | -0.056 | -1.218 | O3  | -5.084 | -0.991 | -1.634 |
| H1  | 2.344  | 2.116  | -0.301 | H1  | -2.543 | -1.601 | -0.976 |
| H2  | -1.38  | 2.878  | 1.784  | H2  | 1.193  | -3.298 | 0.427  |
| H3  | 0.541  | 1.686  | 2.609  | H3  | -0.618 | -2.404 | 1.756  |
| H4  | 0.996  | 2.775  | 1.337  | H4  | -1.188 | -2.897 | 0.193  |
| H5  | 3.855  | -1.151 | 0.905  | H5  | -3.763 | 1.032  | 1.491  |
| H6  | 3.737  | -1.98  | -0.637 | H6  | -3.669 | 2.373  | 0.359  |
| H7  | 1.262  | -1.832 | -0.566 | H7  | -1.215 | 2.09   | 0.179  |
| H8  | 1.875  | -2.692 | 0.832  | H8  | -1.686 | 2.389  | 1.842  |
| H9  | -1.969 | -0.528 | -2.523 | H9  | 1.807  | 1.403  | -2.372 |
| H10 | -3.023 | 0.825  | -2.091 | H10 | 2.823  | -0.018 | -2.532 |
| H11 | -0.907 | -0.481 | 2.137  | H11 | 0.996  | -0.268 | 2.026  |
| H12 | -0.478 | -2.137 | 1.763  | H12 | 0.657  | 1.427  | 2.313  |

|     |        |        |        |     |        |        |        |
|-----|--------|--------|--------|-----|--------|--------|--------|
| H13 | -0.501 | 0.607  | -1.107 | H13 | 0.365  | -0.098 | -1.344 |
| H14 | -0.722 | -1.661 | -0.671 | H14 | 0.717  | 1.847  | -0.153 |
| H15 | -2.599 | -2.761 | 0.037  | H15 | 2.682  | 2.594  | 0.741  |
| H16 | -4.369 | -0.638 | -0.733 | H16 | 4.3    | 0.778  | -0.811 |
| H17 | -4.433 | -1.843 | 1.431  | H17 | 3.088  | 1.012  | 2.596  |
| H18 | -2.916 | -1.896 | 2.338  | H18 | 3.579  | -0.252 | 1.465  |
| H19 | -3.518 | -0.355 | 1.716  | H19 | 4.548  | 1.22   | 1.62   |
| H20 | 1.904  | -0.546 | -2.335 | H20 | -3.121 | 0.393  | -2.721 |
| H21 | 3.632  | -0.575 | -2.75  | H21 | -2.031 | 1.54   | -1.924 |
| H22 | 2.752  | 0.965  | -2.693 | H22 | -3.759 | 1.918  | -2.081 |
| H23 | 2.715  | -0.646 | 2.783  | H23 | -2.573 | -0.202 | 2.943  |
| H24 | 1.517  | -1.919 | 3.087  | H24 | -1.277 | 0.809  | 3.612  |
| H25 | 1.132  | -0.234 | 3.454  | H25 | -0.99  | -0.906 | 3.296  |
| H26 | -3.993 | 1.38   | 0.107  | H26 | 3.065  | -2.205 | -1.919 |
| H27 | -3.402 | 2.719  | 1.095  | H27 | 3.834  | -1.314 | -0.615 |
| H28 | 4.596  | 1.774  | -1.124 | H28 | -5.005 | -0.584 | 0.409  |
| H29 | 4.855  | 0.972  | 0.441  | H29 | -5.464 | 0.744  | -0.673 |
| H30 | -4.181 | -1.79  | -2.722 | H30 | 3.071  | 3.176  | -1.585 |
| H31 | -2.583 | 3.564  | -0.965 | H31 | 3.403  | -3.187 | 0.697  |
| H32 | 6.455  | 0.383  | -1.13  | H32 | -4.676 | -1.848 | -1.434 |

|              |        |        |        |    |        |        |       |
|--------------|--------|--------|--------|----|--------|--------|-------|
| <b>1-A-c</b> |        |        |        |    |        |        |       |
| C1           | -1.907 | -0.582 | -1.084 | H6 | -1.955 | 1.391  | 1.121 |
| C2           | 1.468  | -2.111 | -1.004 | H7 | -1.912 | -0.486 | 2.774 |
| C3           | -0.946 | -1.274 | -0.448 | H8 | -2.83  | -1.494 | 1.668 |

|     |        |        |        |     |        |        |        |
|-----|--------|--------|--------|-----|--------|--------|--------|
| C4  | 2.227  | -1.022 | -0.812 | H9  | 3.672  | 1.29   | -0.697 |
| C5  | -0.027 | -2.182 | -1.255 | H10 | 2.755  | 1.836  | -2.088 |
| C6  | -2.659 | 0.556  | 1.027  | H11 | 1.319  | -0.914 | 1.666  |
| C7  | -2.085 | -0.688 | 1.709  | H12 | 0.192  | 0.183  | 2.434  |
| C8  | 2.665  | 1.552  | -1.032 | H13 | 0.933  | 0.42   | -1.639 |
| C9  | 0.446  | -0.283 | 1.472  | H14 | -0.091 | 1.257  | 0.093  |
| C10 | 1.648  | 0.391  | -0.812 | H15 | 0.907  | 2.704  | 1.59   |
| C11 | 0.831  | 0.824  | 0.483  | H16 | 2.971  | 3.427  | 0.072  |
| C12 | 1.61   | 2.025  | 1.089  | H17 | 3.469  | 0.995  | 1.668  |
| C13 | 2.165  | 2.717  | -0.165 | H18 | 2.304  | 1.184  | 2.98   |
| C14 | -2.965 | 0.311  | -0.468 | H19 | 3.239  | 2.577  | 2.422  |
| C15 | -0.769 | -1.208 | 1.072  | H20 | -3.819 | 2.287  | -0.824 |
| C16 | 2.718  | 1.671  | 2.091  | H21 | -3.232 | 1.491  | -2.293 |
| C17 | -3.024 | 1.652  | -1.228 | H22 | -2.073 | 2.191  | -1.148 |
| C18 | -0.511 | -2.613 | 1.664  | H23 | -0.433 | -2.547 | 2.757  |
| C19 | 3.717  | -1.185 | -0.591 | H24 | 0.422  | -3.047 | 1.292  |
| C20 | -4.327 | -0.419 | -0.643 | H25 | -1.33  | -3.303 | 1.429  |
| O1  | 1.073  | 3.417  | -0.78  | H26 | 4.015  | -0.659 | 0.332  |
| O2  | 4.081  | -2.559 | -0.506 | H27 | 4.265  | -0.697 | -1.413 |
| O3  | -5.466 | 0.353  | -0.261 | H28 | -4.309 | -1.375 | -0.1   |
| H1  | -1.969 | -0.671 | -2.171 | H29 | -4.474 | -0.648 | -1.704 |
| H2  | 1.975  | -3.072 | -1.001 | H30 | 1.383  | 3.735  | -1.643 |
| H3  | -0.227 | -2.011 | -2.323 | H31 | 5.048  | -2.592 | -0.451 |
| H4  | -0.329 | -3.223 | -1.071 | H32 | -5.471 | 0.412  | 0.707  |
| H5  | -3.568 | 0.887  | 1.548  |     |        |        |        |



### The Molecular docking assays

The crystal structures of soman-aged BChE (PDB ID: 4b0p) were obtained from the protein data bank for docking simulations. Before docking, protein should be prepared with removing the water and other co-crystallized small molecules and adding hydrogens. Then the cleaning protein were prepared in the module Prepare Protein. For ligands, potentials were assigned using CHARMM force field and energy minimized. Then prepared with the module Prepare Ligands. The binding pocket of the protein was defined based on the volume occupied by the known ligand pose already in the active site. During the docking process top 10 conformations were saved for each ligand based on Cdocker score value using the smart minimize method through CDOCKER methods. The best-scoring pose as judged by the Cdocker Interaction energy score was chosen to visual analysis using PyMOL software.

**Table S3.** The inhibitory value and docking score of compounds **1-4** with BChE.

| Compound     | IC <sub>50</sub> (μM) <sup>a</sup> | Docking Score <sup>b</sup> |
|--------------|------------------------------------|----------------------------|
| <b>1</b>     | 14.71 ± 1.07                       | 37.29                      |
| <b>2</b>     | 26.47 ± 0.35                       | 31.43                      |
| <b>3</b>     | 31.51 ± 0.28                       | 28.64                      |
| <b>4</b>     | 11.37 ± 0.85                       | 32.88                      |
| Rivastigmine | 4.88 ± 0.11                        |                            |

<sup>a</sup> IC<sub>50</sub> value of compounds against BChE.

<sup>b</sup> The score of Cdocker interaction energy.

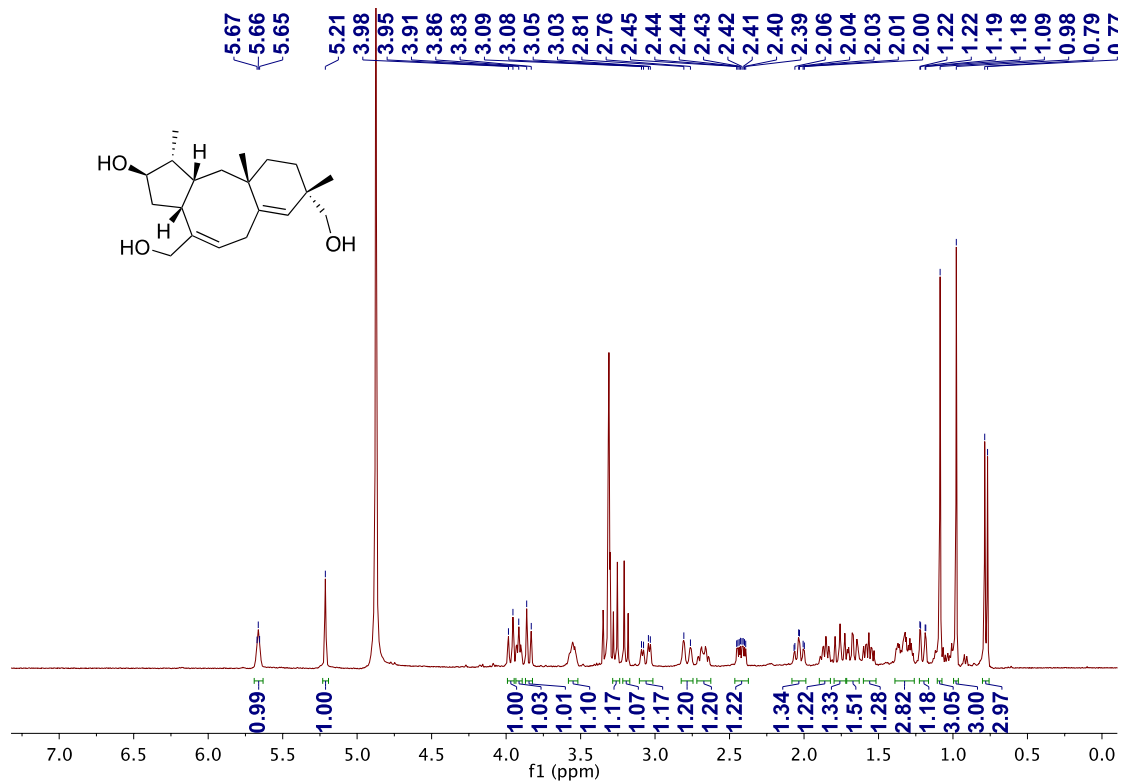

Figure S1.  $^1\text{H}$  NMR spectrum of talaronid A (1) in  $\text{CD}_3\text{OD}$

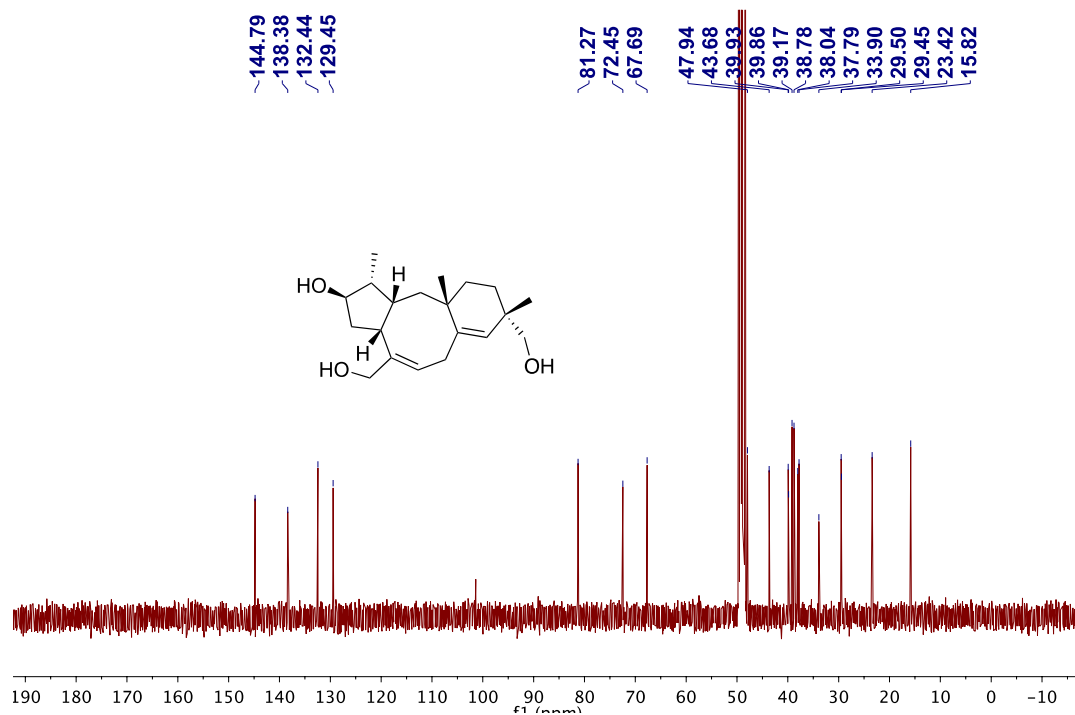

Figure S2.  $^{13}\text{C}$  NMR spectrum of talaronid A (1) in  $\text{CD}_3\text{OD}$

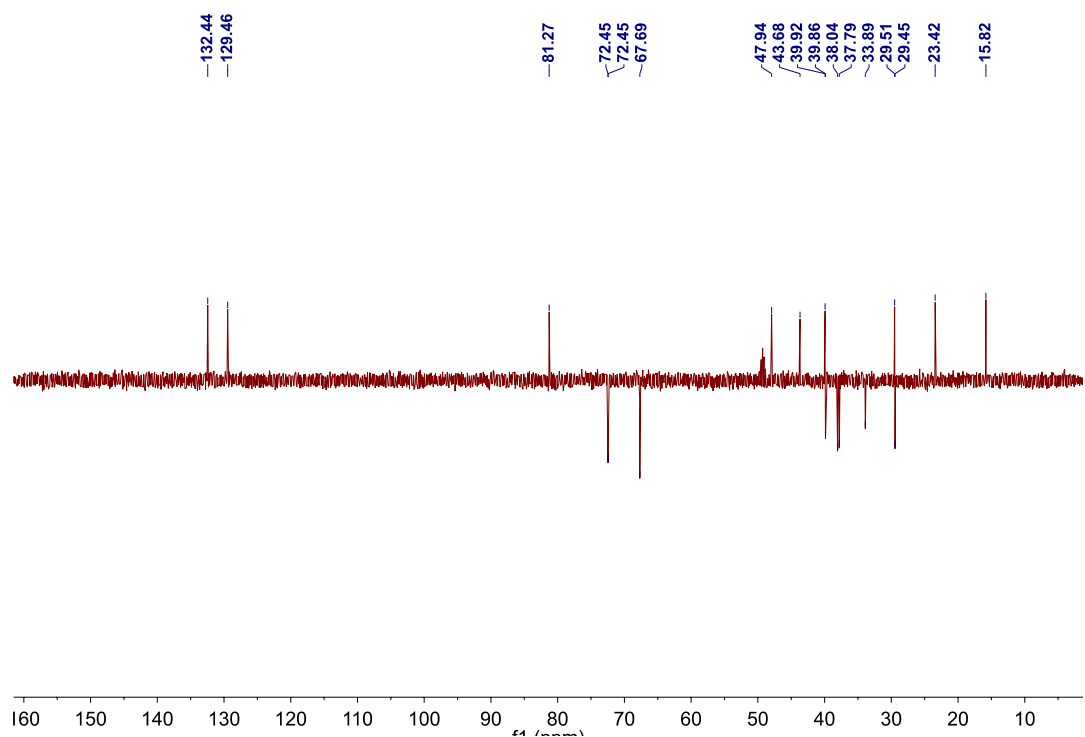

**Figure S3.** DEPT spectrum of talaronid A (**1**) in CD<sub>3</sub>OD

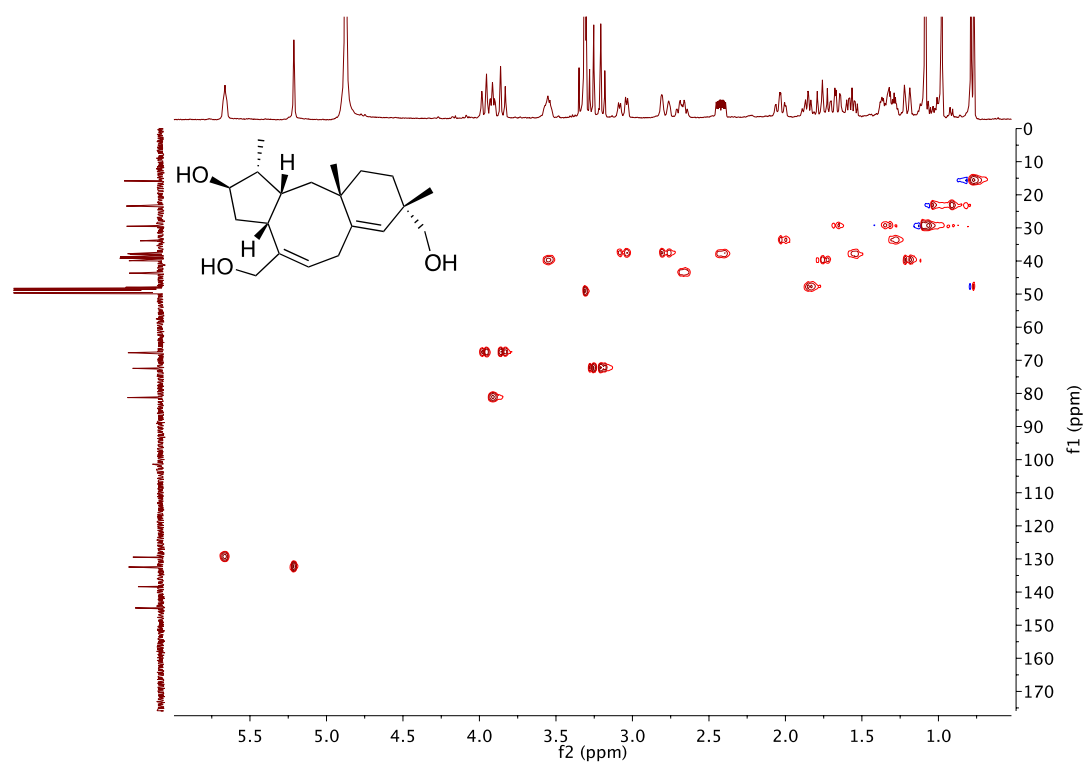

**Figure S4.** HSQC spectrum of talaronid A (**1**) in CD<sub>3</sub>OD

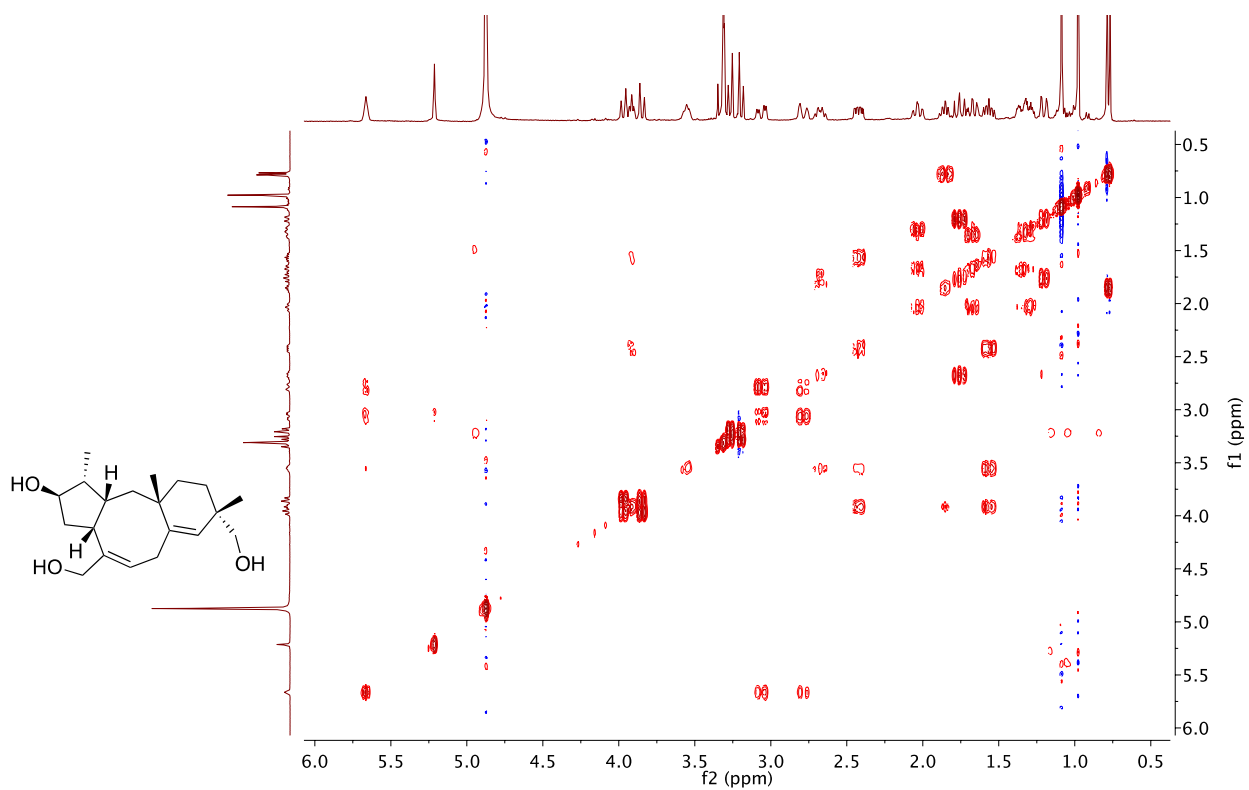

**Figure S5**  $^1\text{H}$ - $^1\text{H}$  COSY spectrum of talaronid A (**1**) in  $\text{CD}_3\text{OD}$

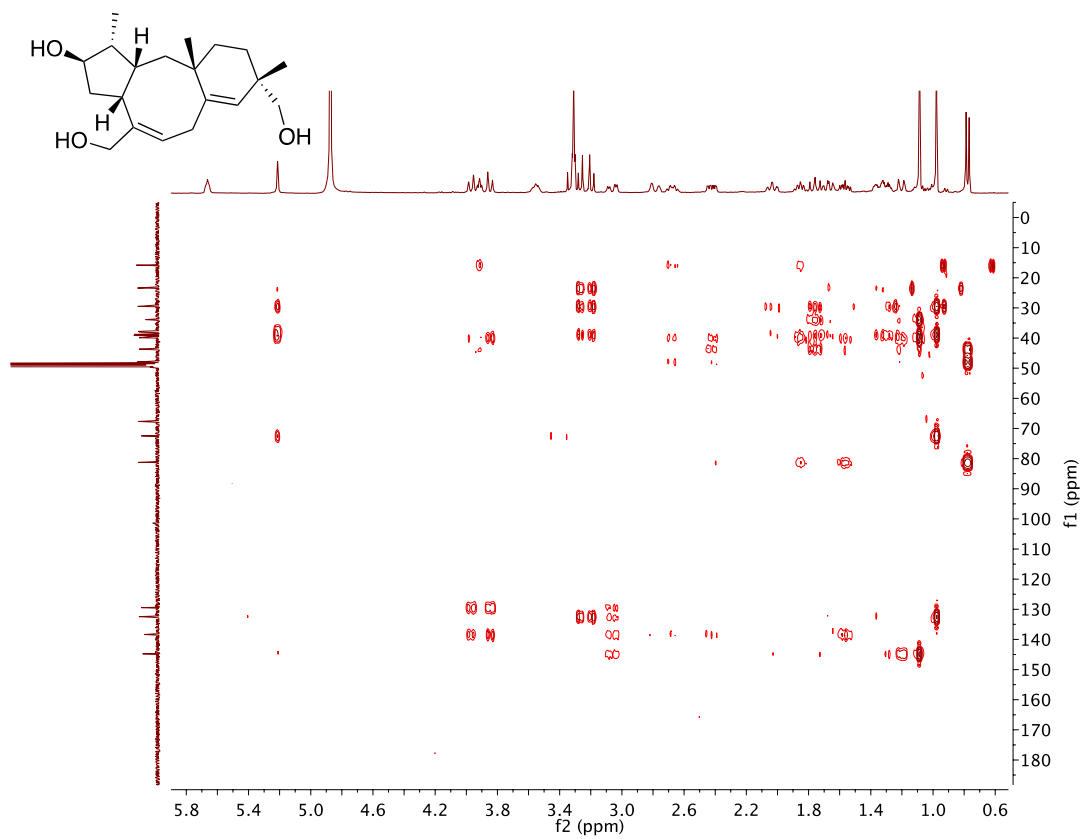

**Figure S6.** HMBC spectrum of talaronid A (**1**) in  $\text{CD}_3\text{OD}$

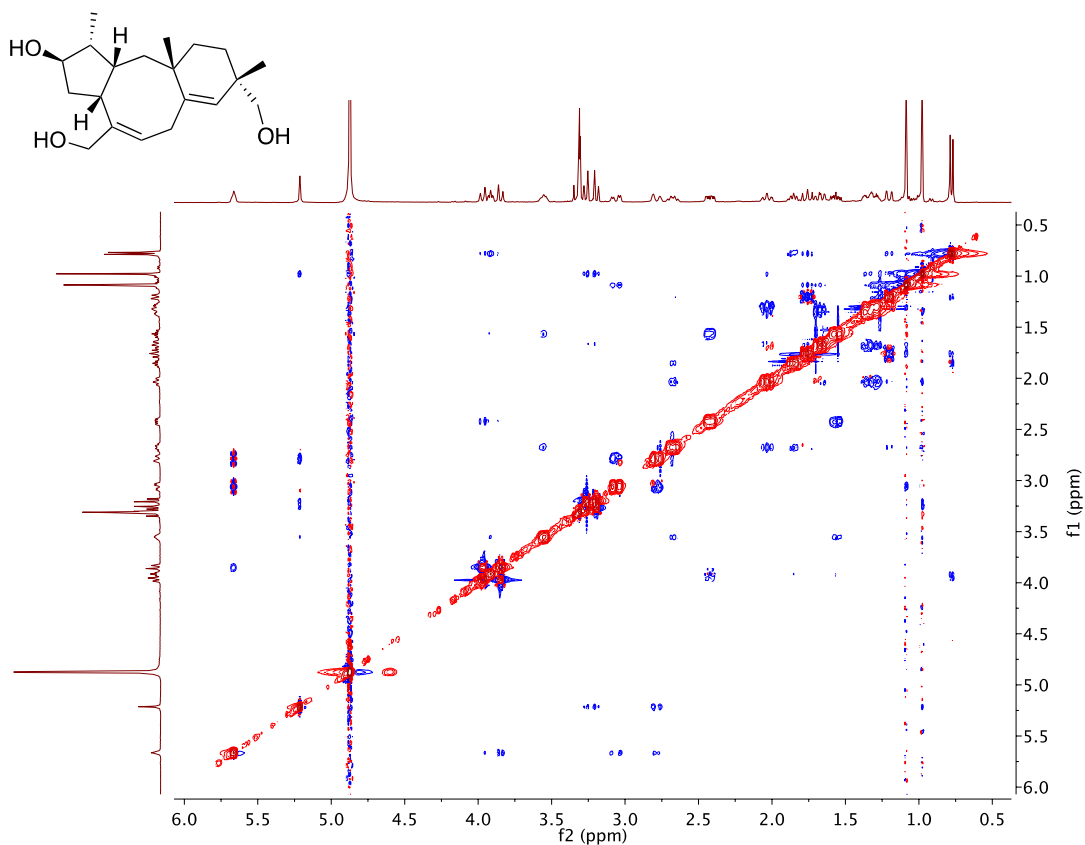

**Figure S7.** NOESY spectrum of talaronid A (**1**) in CD<sub>3</sub>OD

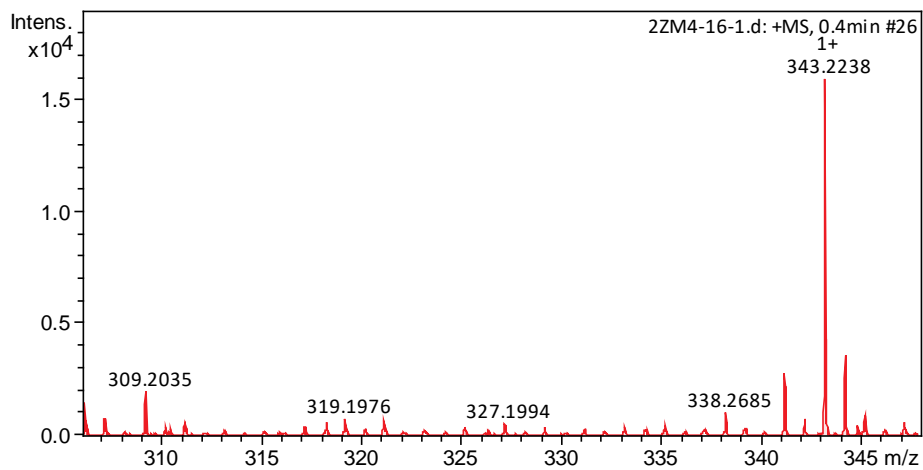

**Figure S8.** (+) ESI-MS spectrum of talaronid A (**1**)

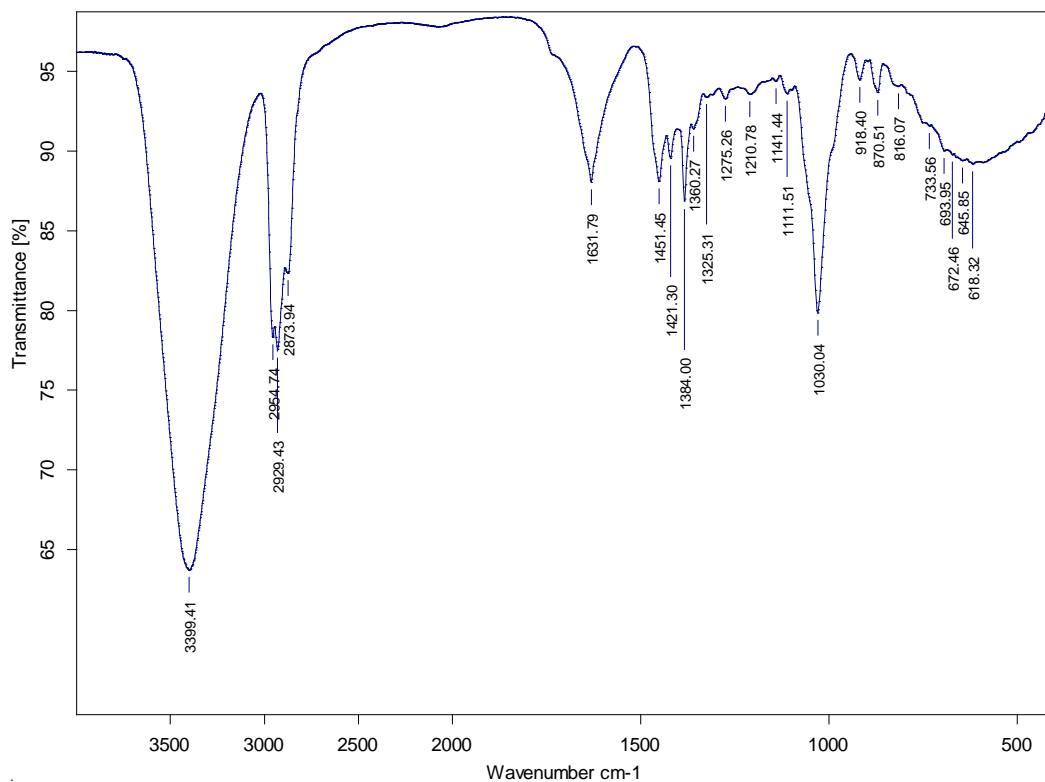

**Figure S9.** IR spectrum of talaronid A (1)

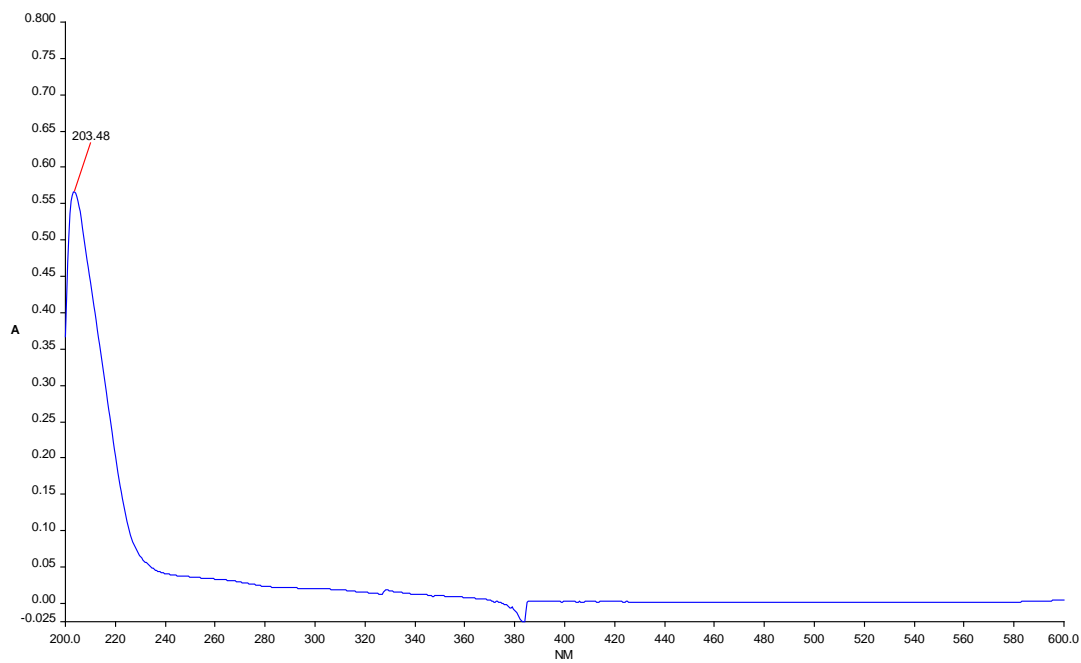

**Figure S10.** UV spectrum of talaronid A (1)

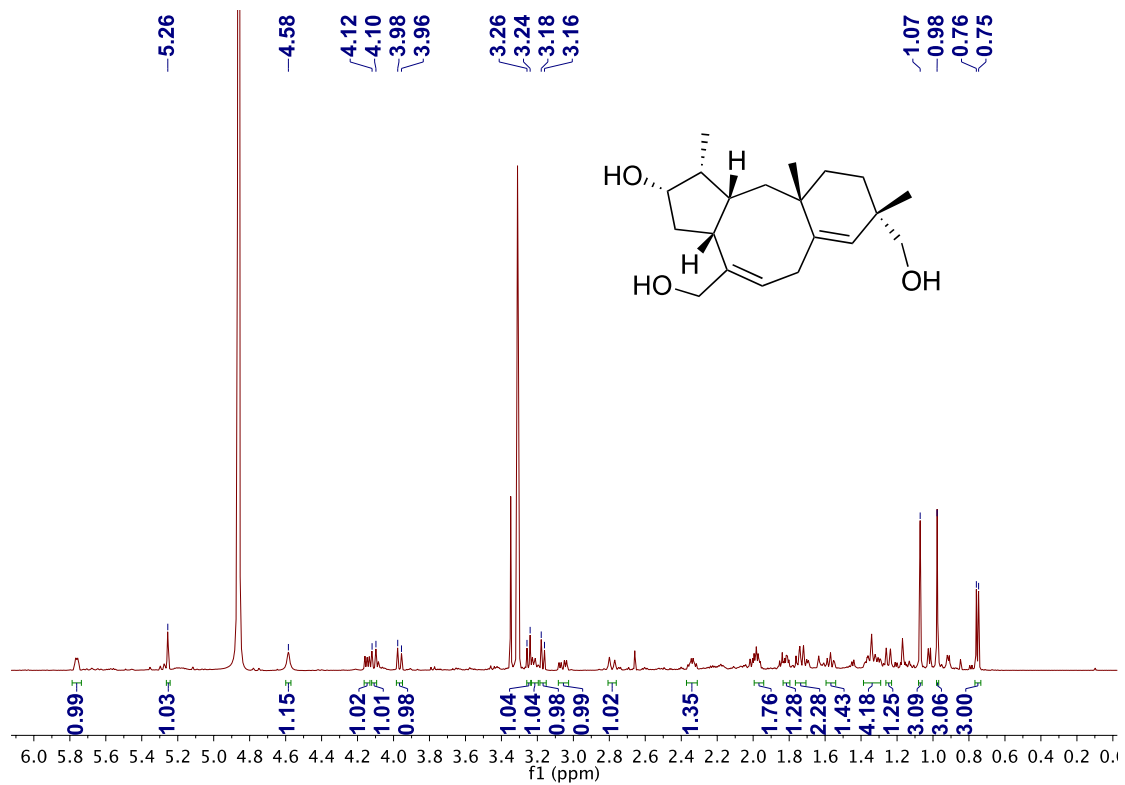

**Figure S11.**  $^1\text{H}$  NMR spectrum of talaronid B (**2**) in  $\text{CD}_3\text{OD}$

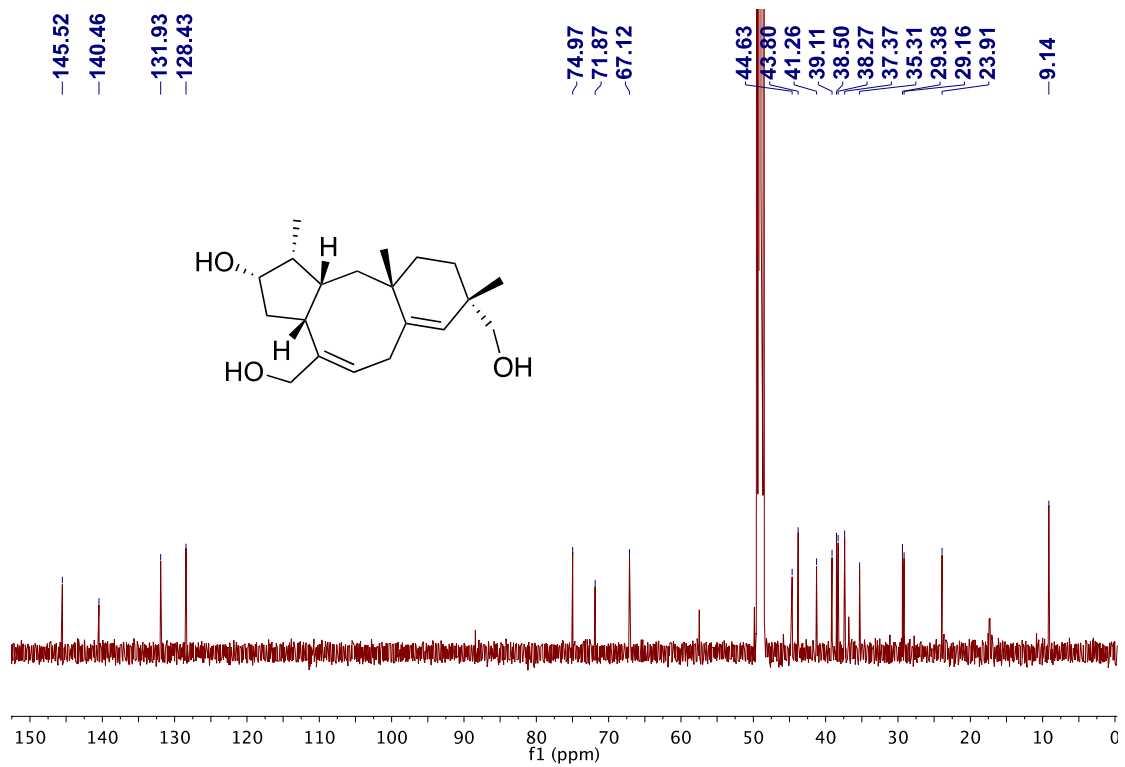

**Figure S12.**  $^{13}\text{C}$  NMR spectrum of talaronid B (**2**) in  $\text{CD}_3\text{OD}$

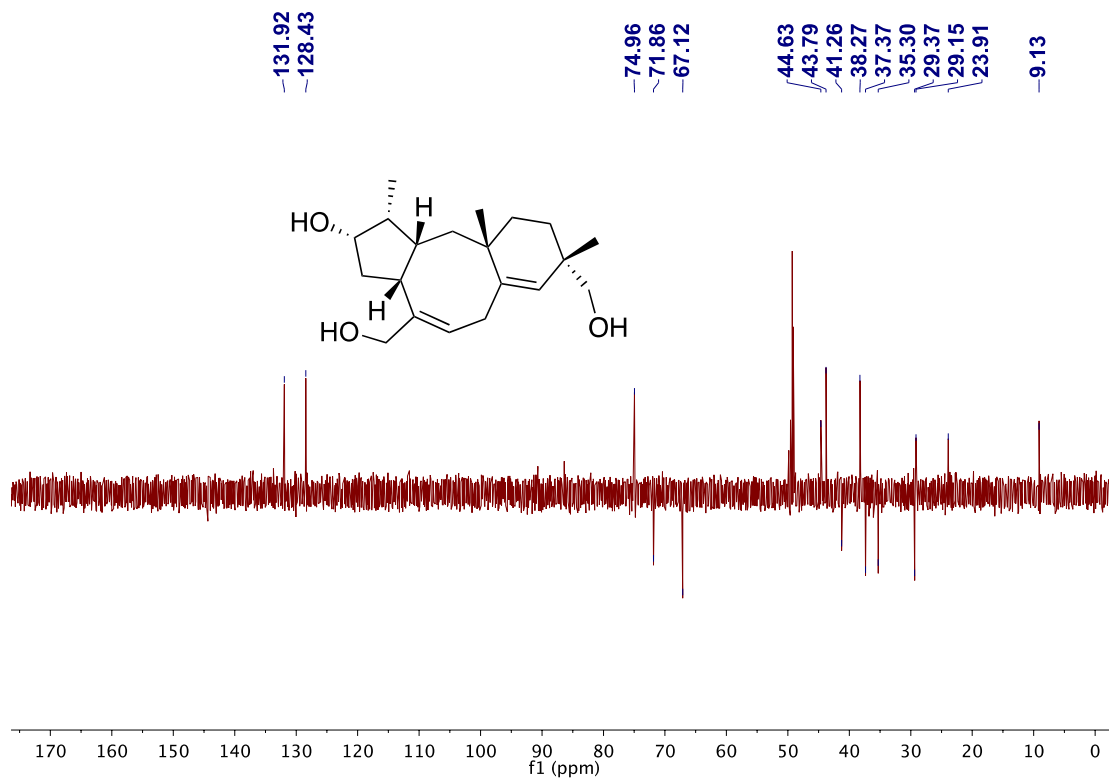

**Figure S13.** DEPT spectrum of talaronid B (**2**) in CD<sub>3</sub>OD

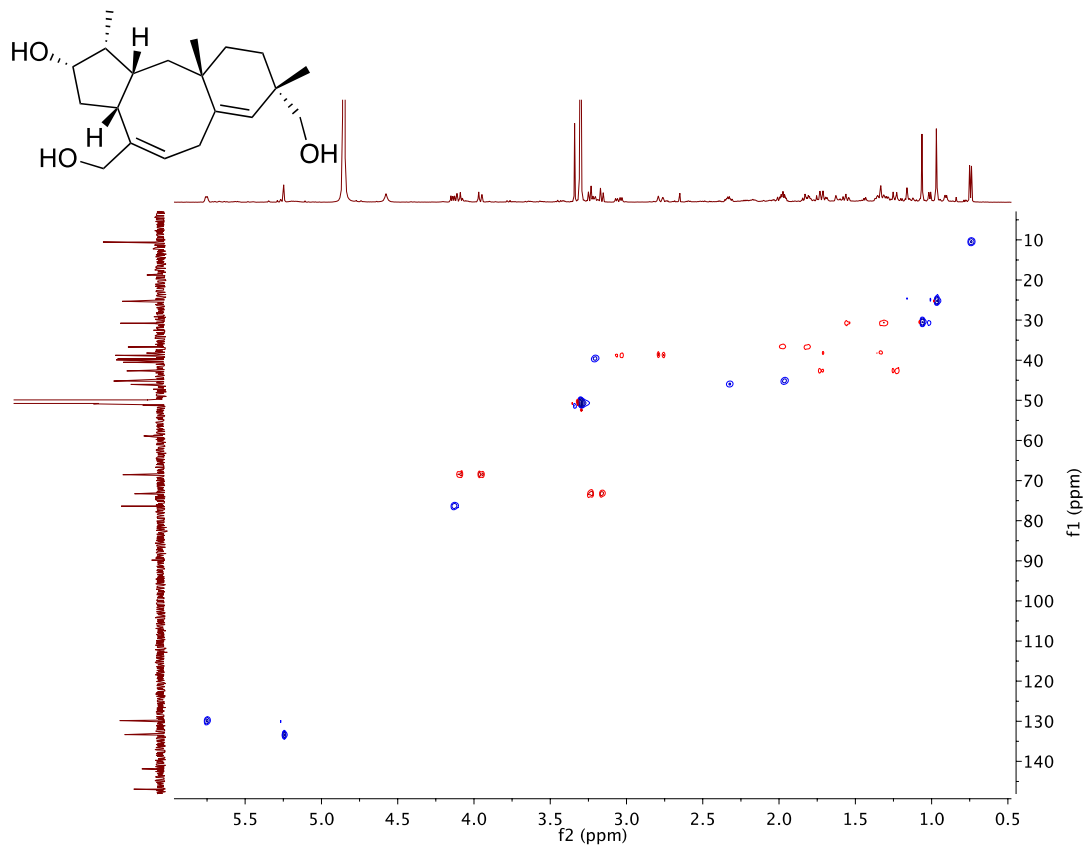

**Figure S14.** HSQC spectrum of talaronid B (**2**) in CD<sub>3</sub>OD



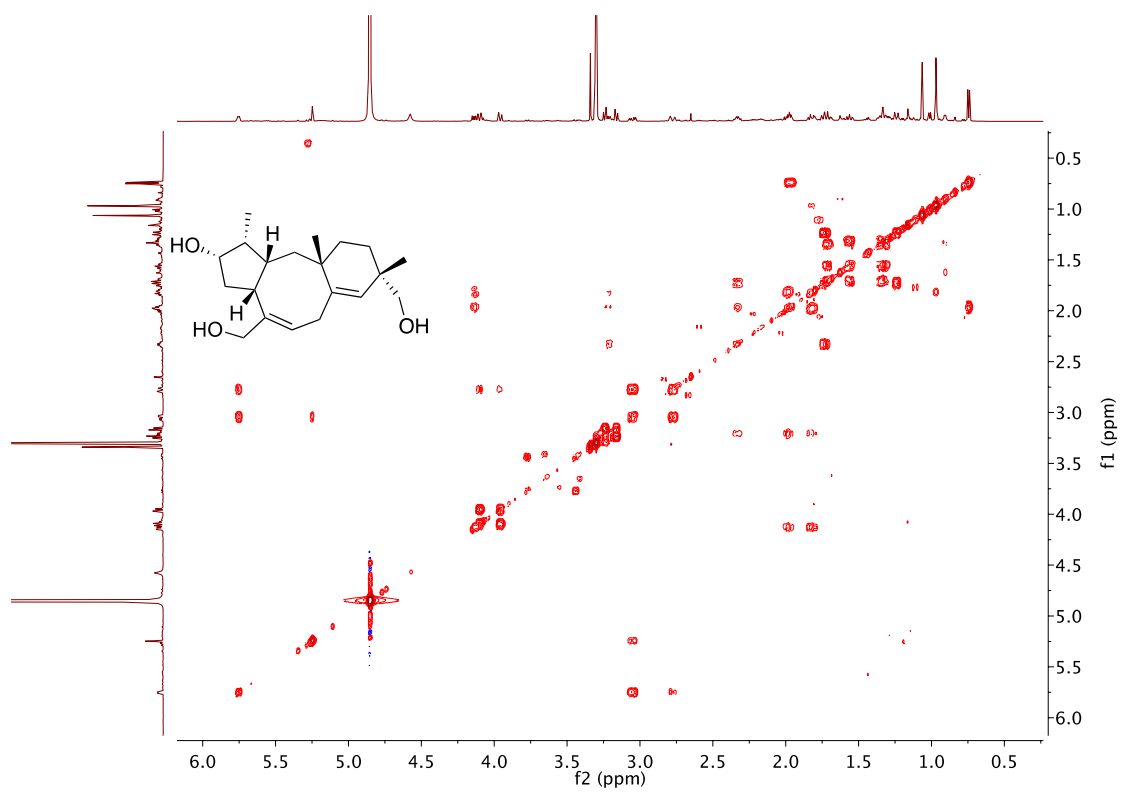

**Figure S15**  $^1\text{H}$ - $^1\text{H}$  COSY spectrum of talaronid B (**2**) in  $\text{CD}_3\text{OD}$

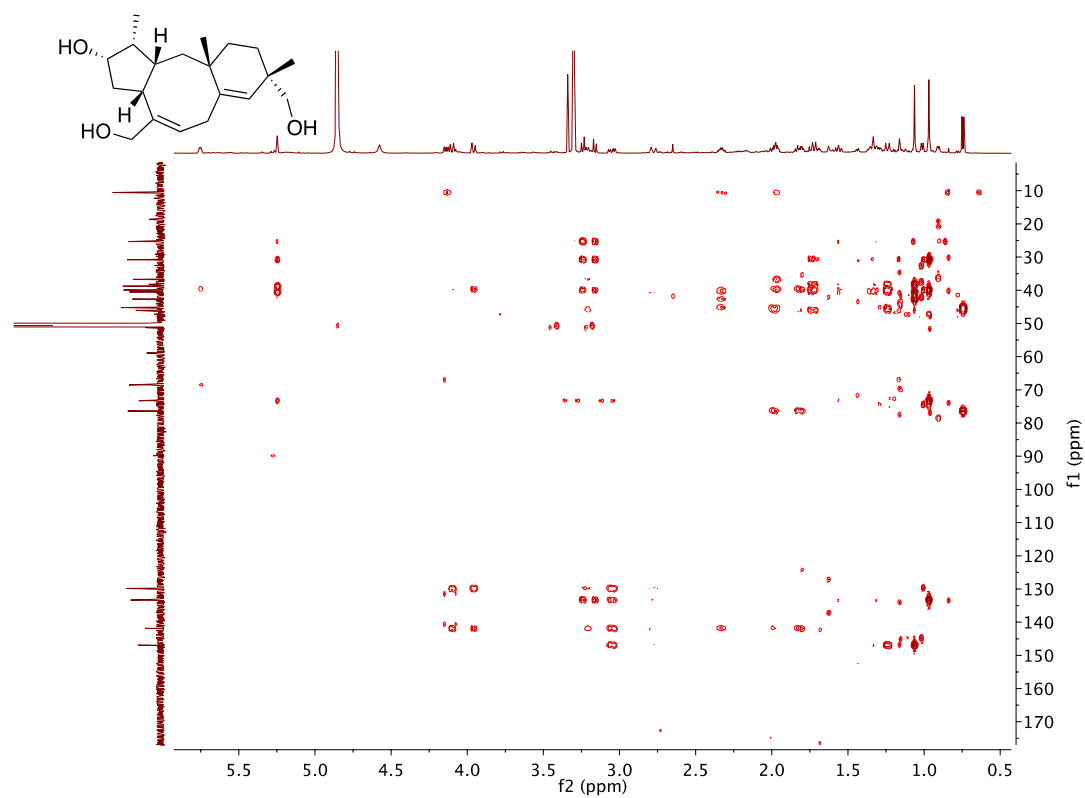

**Figure S16.** HMBC spectrum of talaronid B (**2**) in  $\text{CD}_3\text{OD}$

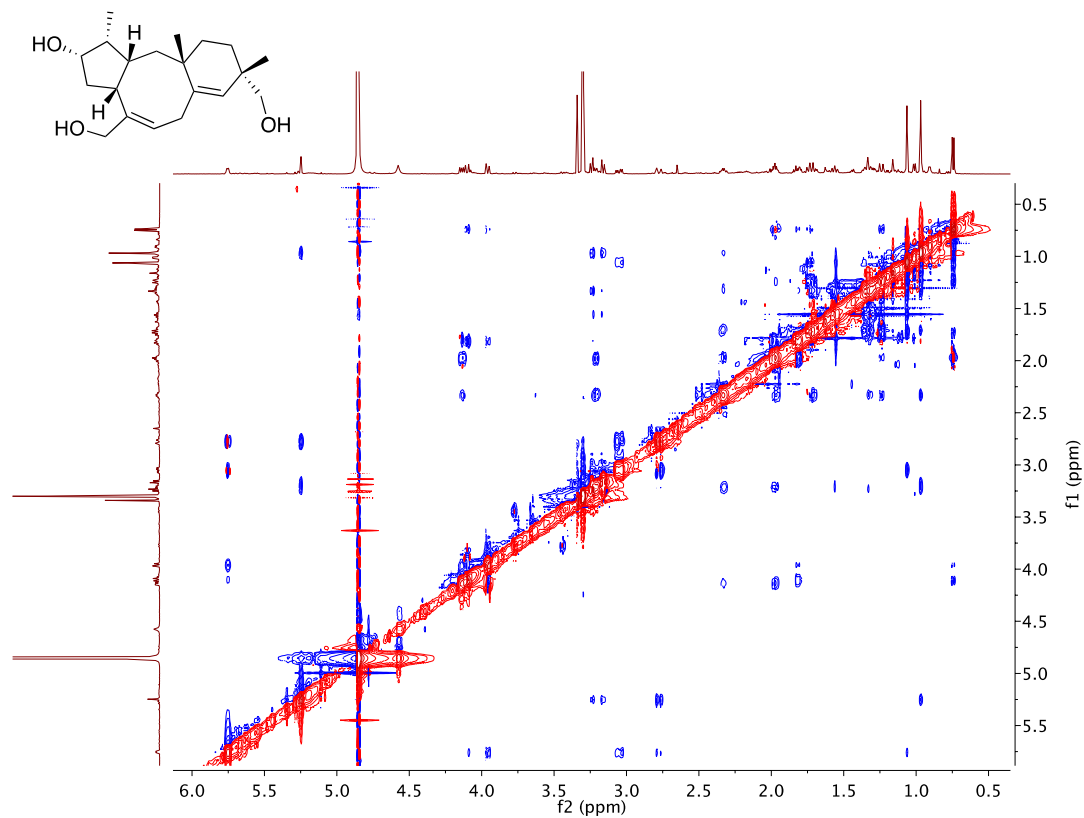

**Figure S17.** NOESY spectrum of talaronid B (**2**) in CD<sub>3</sub>OD

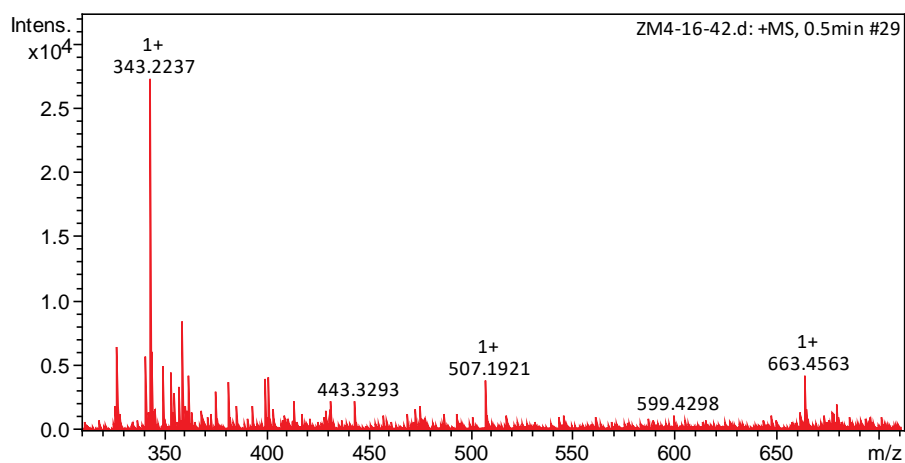

**Figure S18.** (+) ESI-MS spectrum of talaronid B (**2**)

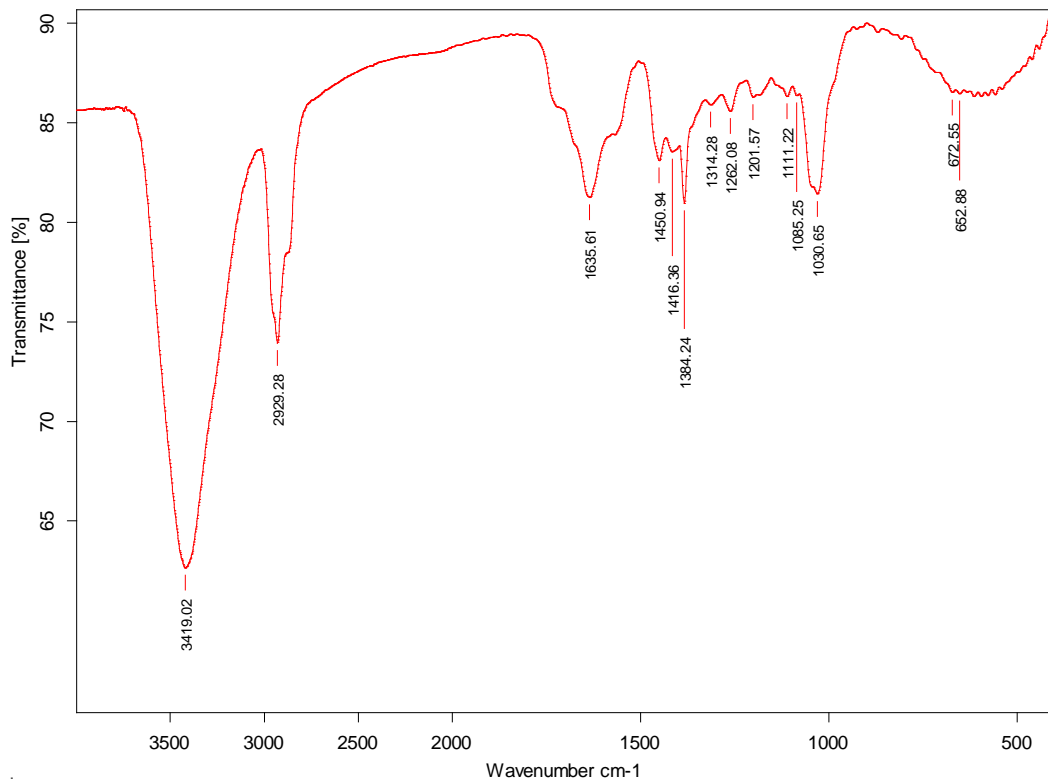

**Figure S19.** IR spectrum of talaronid B (2)

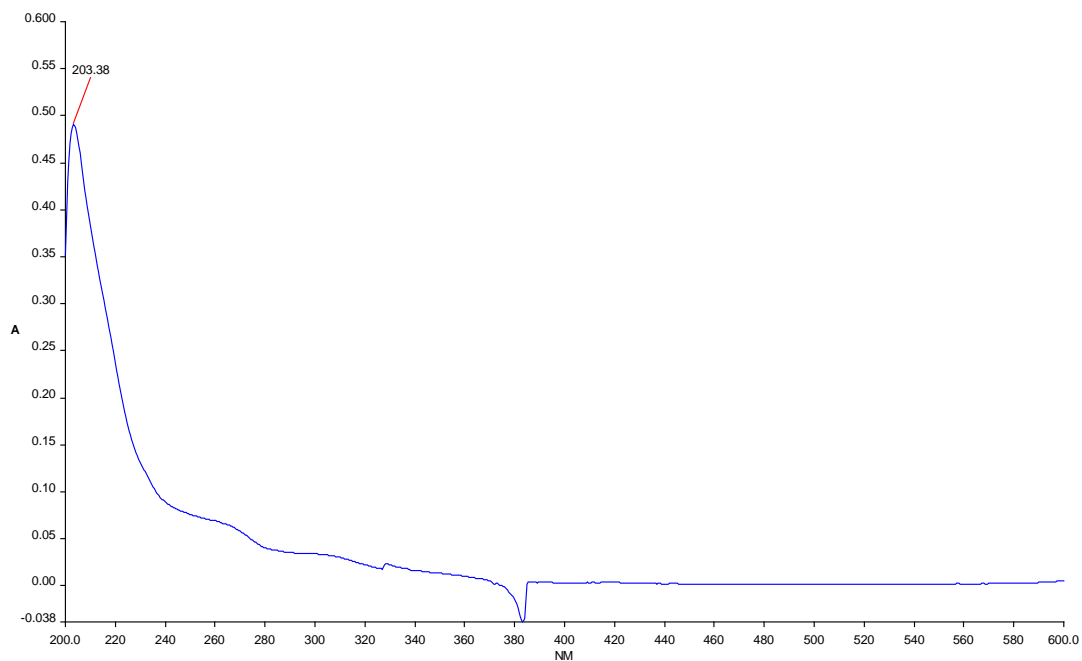

**Figure S20.** UV spectrum of talaronid B (2)

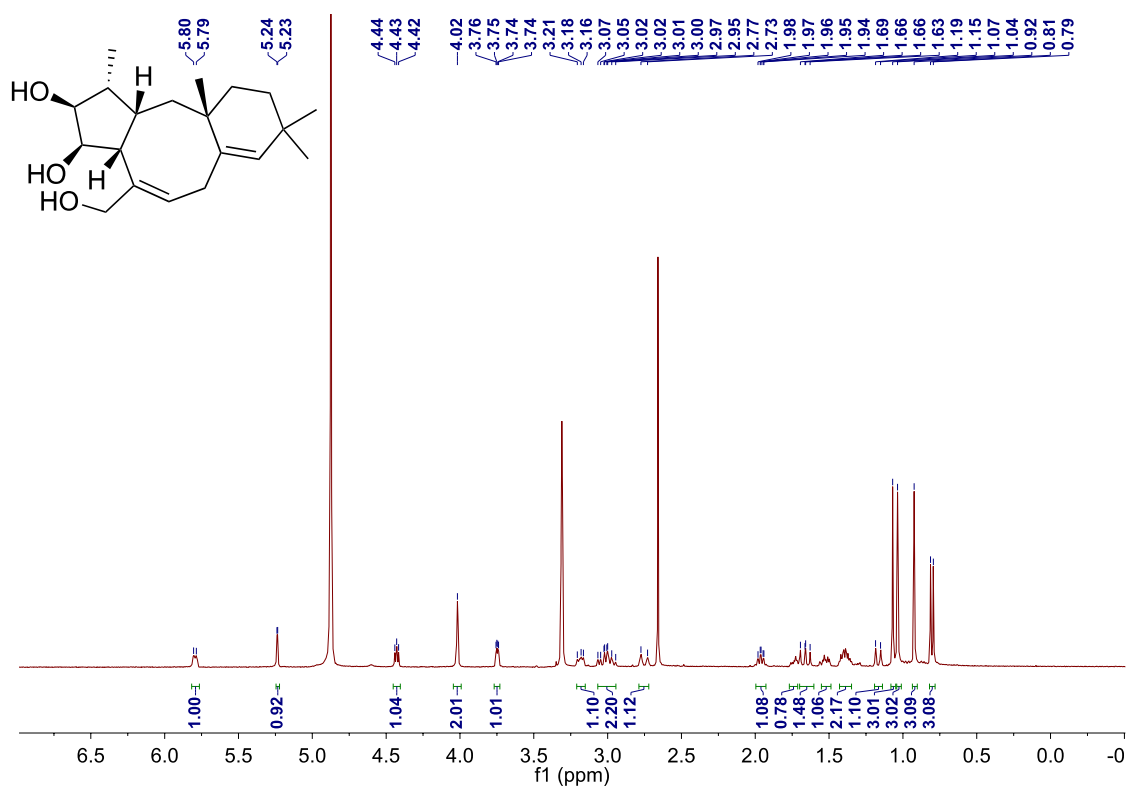

**Figure S21.** <sup>1</sup>H NMR spectrum of talaronid C (**3**) in CD<sub>3</sub>OD

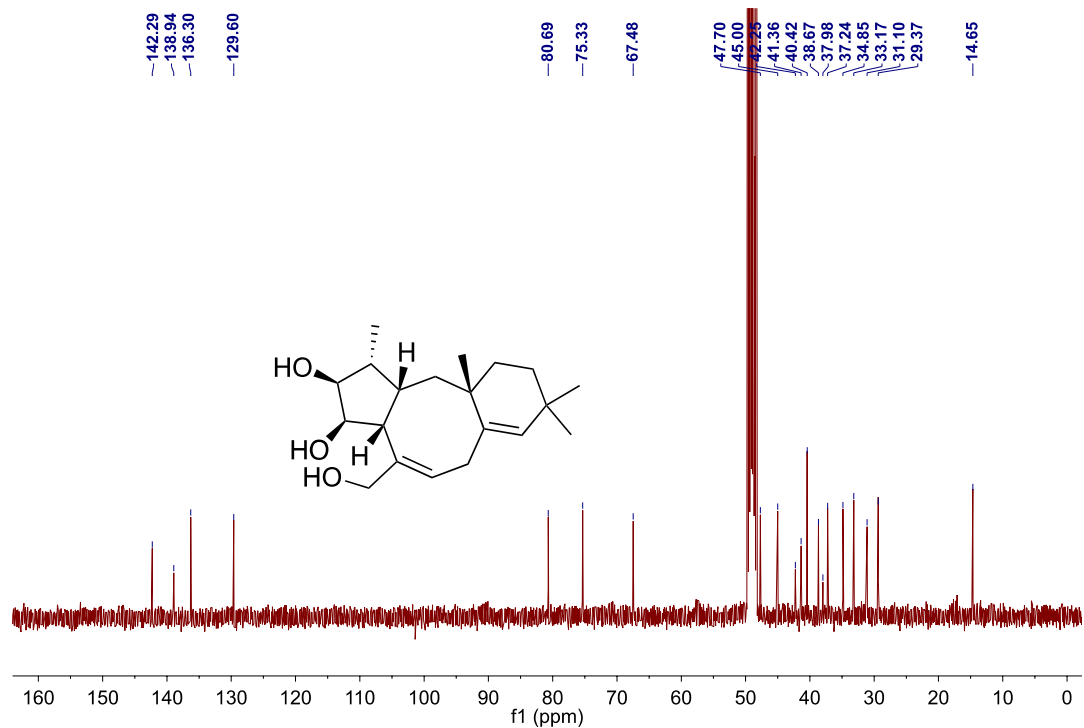

**Figure S22.**  $^{13}\text{C}$  NMR spectrum of talaronid C (**3**) in  $\text{CD}_3\text{OD}$

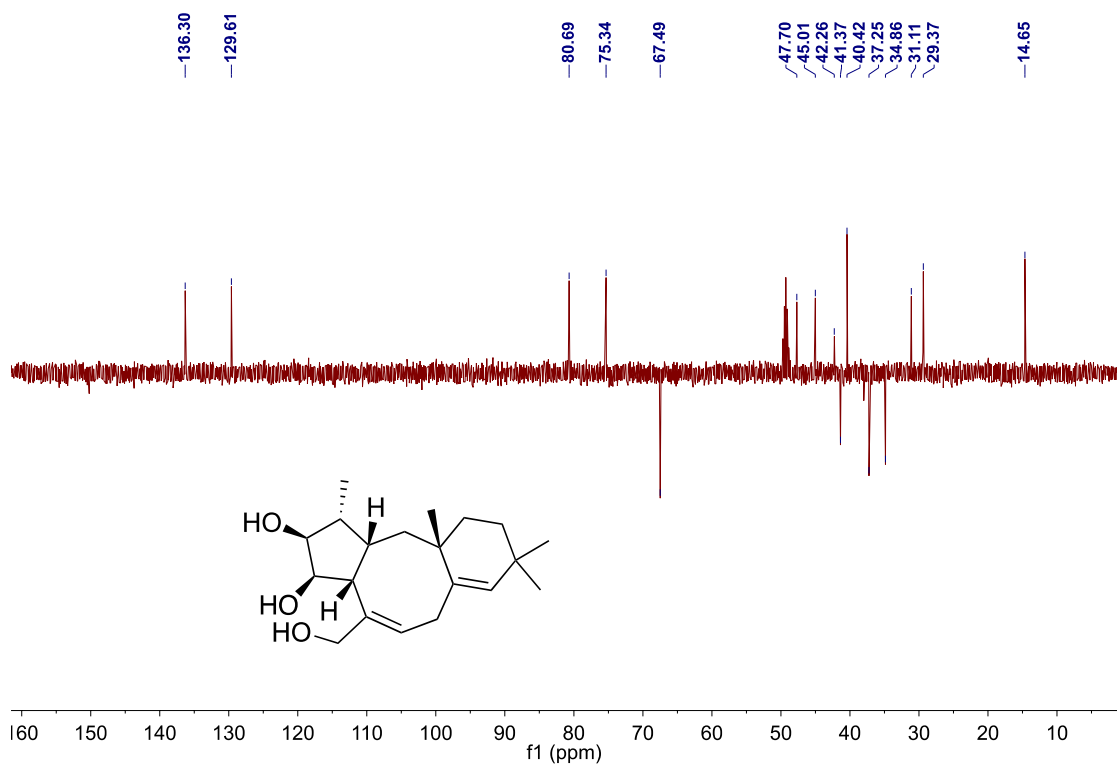

**Figure S23.** DEPT spectrum of talaronid C (**3**) in  $\text{CD}_3\text{OD}$

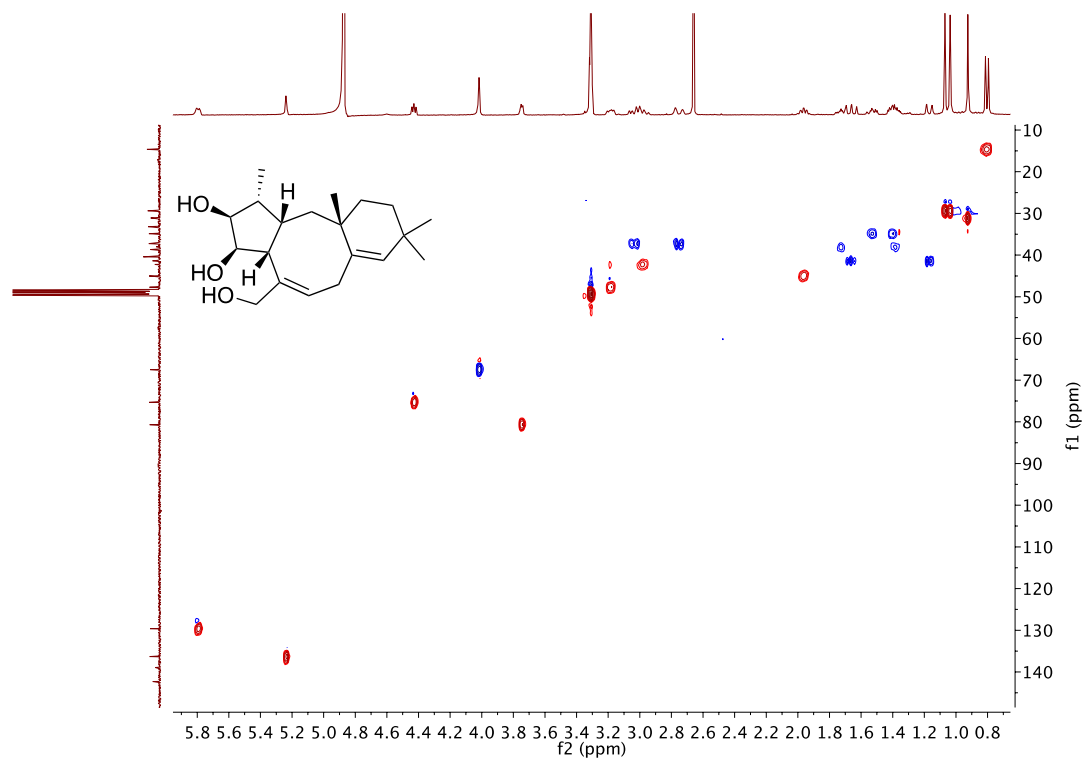

**Figure S24.** HSQC spectrum of talaronid C (**3**) in CD<sub>3</sub>OD

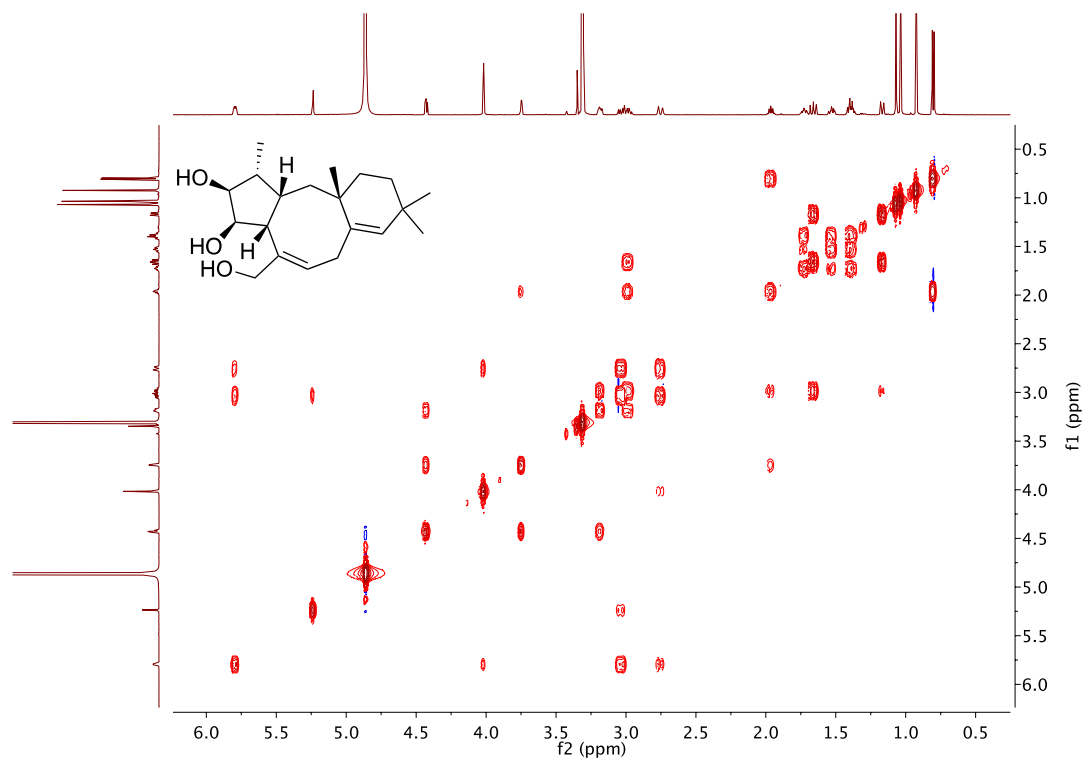

**Figure S25.** <sup>1</sup>H-<sup>1</sup>H COSY spectrum of talaronid C (**3**) in CD<sub>3</sub>OD

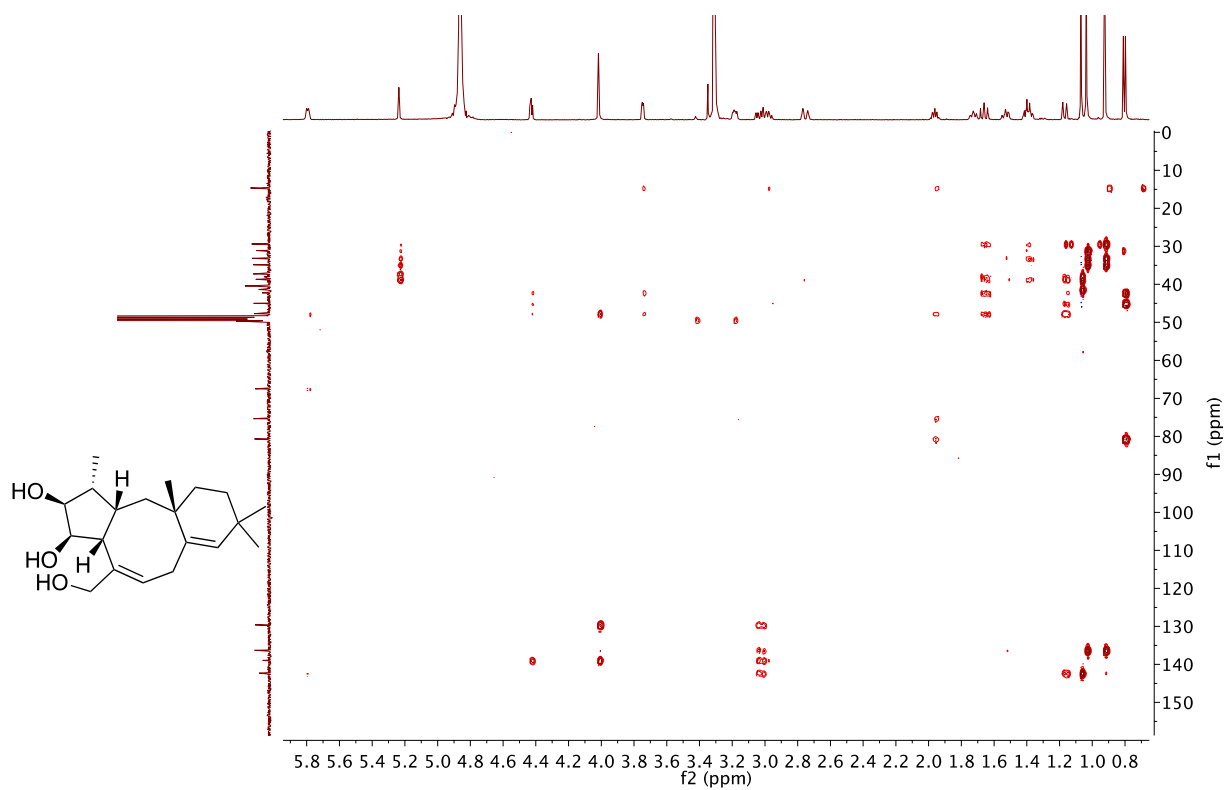

**Figure S26.** HMBC spectrum of talaronid C (**3**) in CD<sub>3</sub>OD

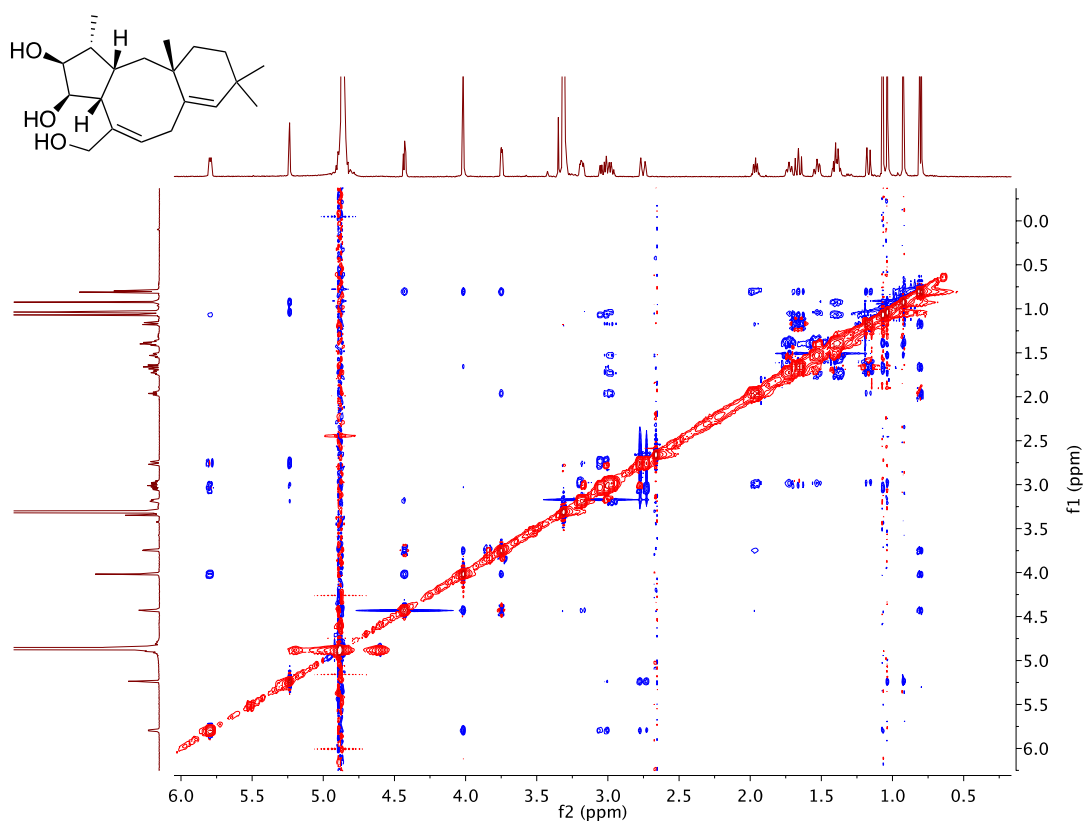

**Figure S27.** NOESY spectrum of talaronid C (**3**) in CD<sub>3</sub>OD

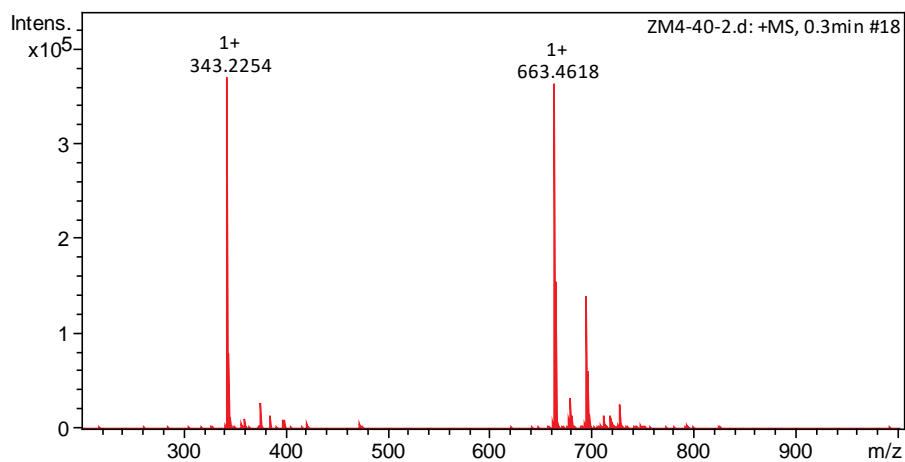

**Figure S28.** (+) ESI-MS spectrum of talaronid C (**3**)

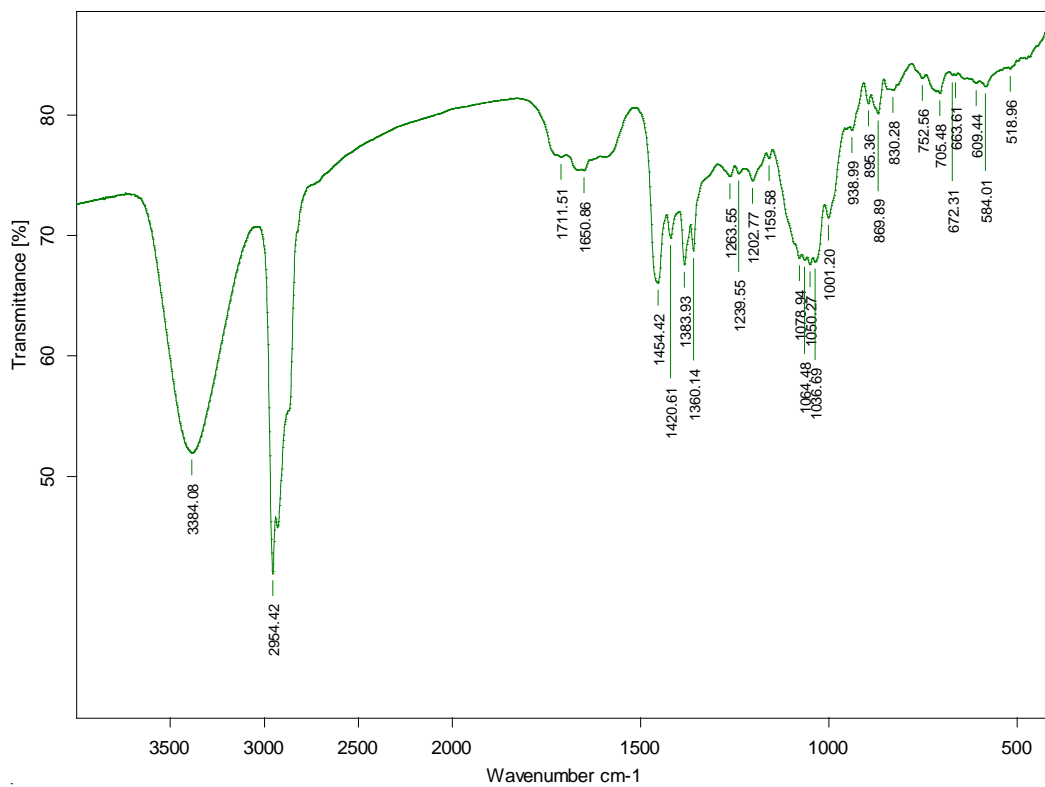

**Figure S29.** IR spectrum of talaronid C (**3**)



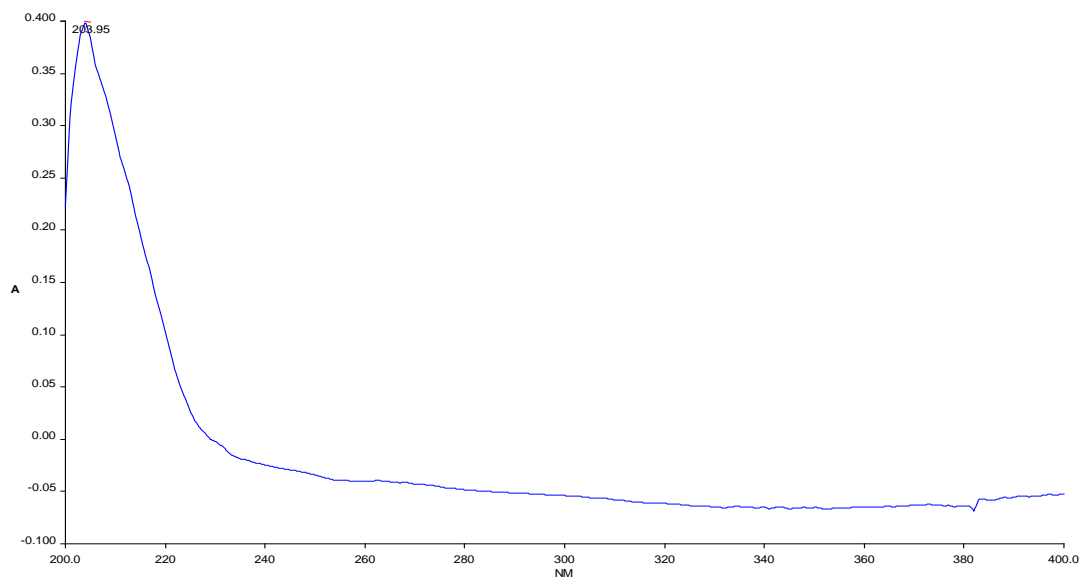

**Figure S30.** UV spectrum of talaronid C (**3**)

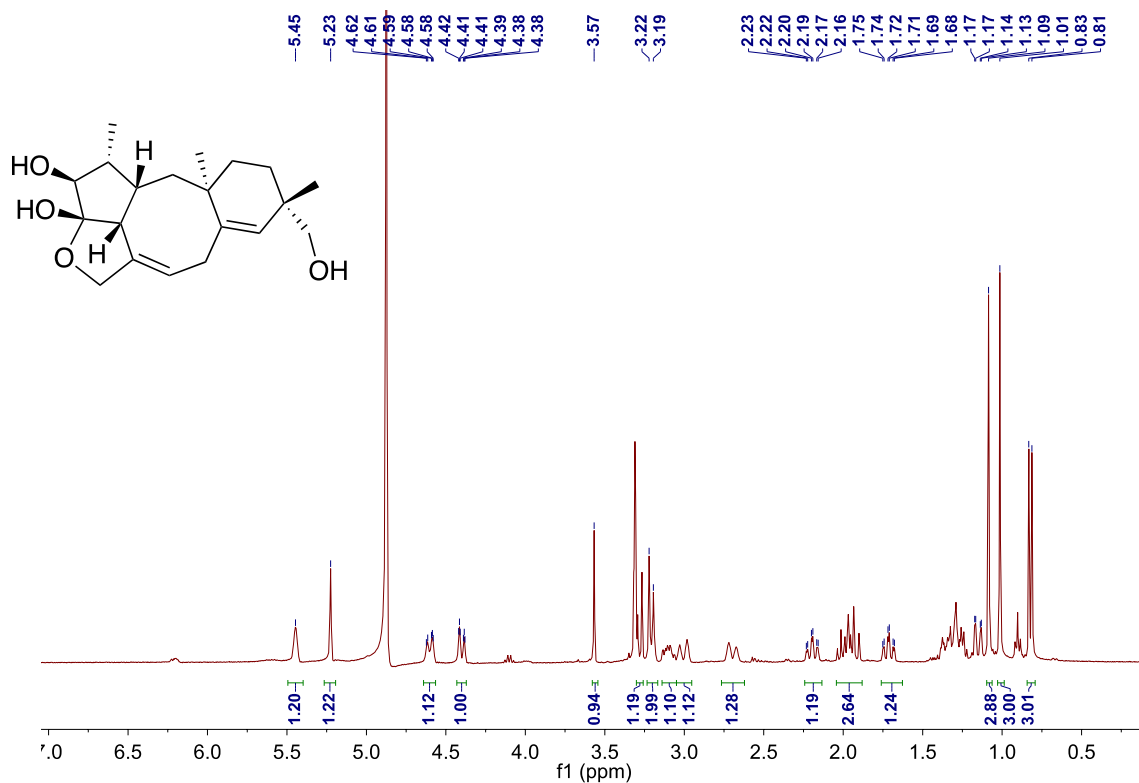

**Figure S31.**  $^1\text{H}$  NMR spectrum of talaronid D (**4**) in  $\text{CD}_3\text{OD}$

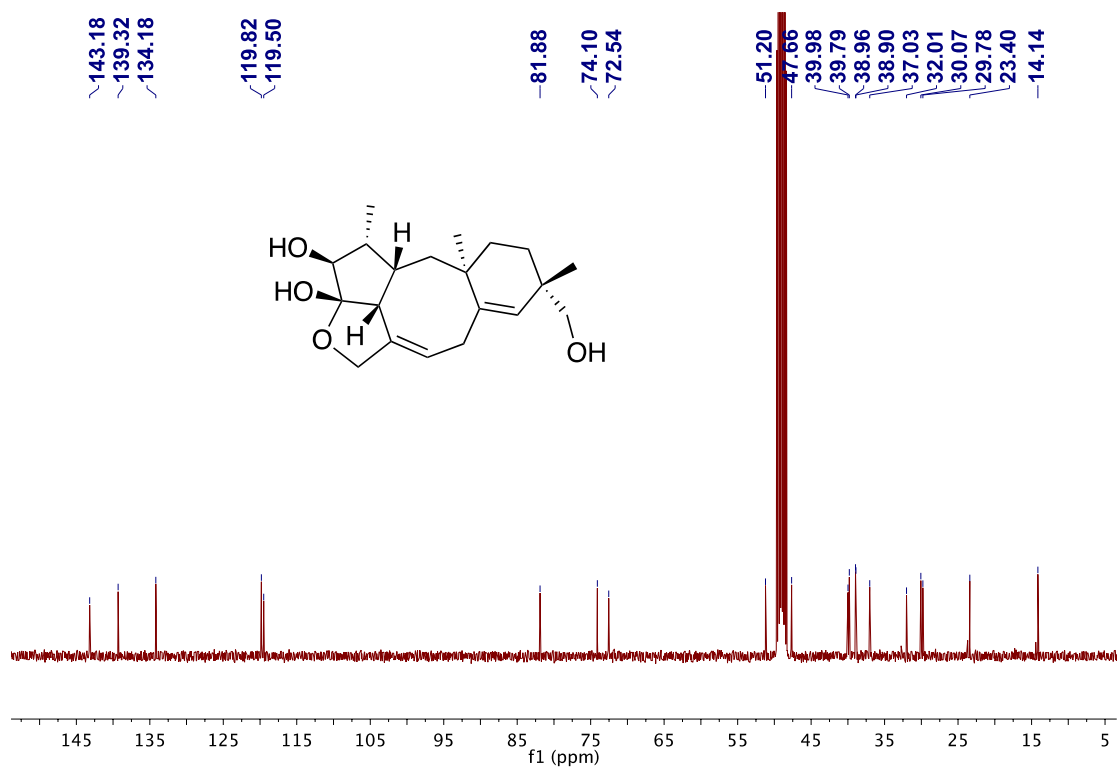

**Figure S32.**  $^{13}\text{C}$  NMR spectrum of talaronid C (**3**) in  $\text{CD}_3\text{OD}$

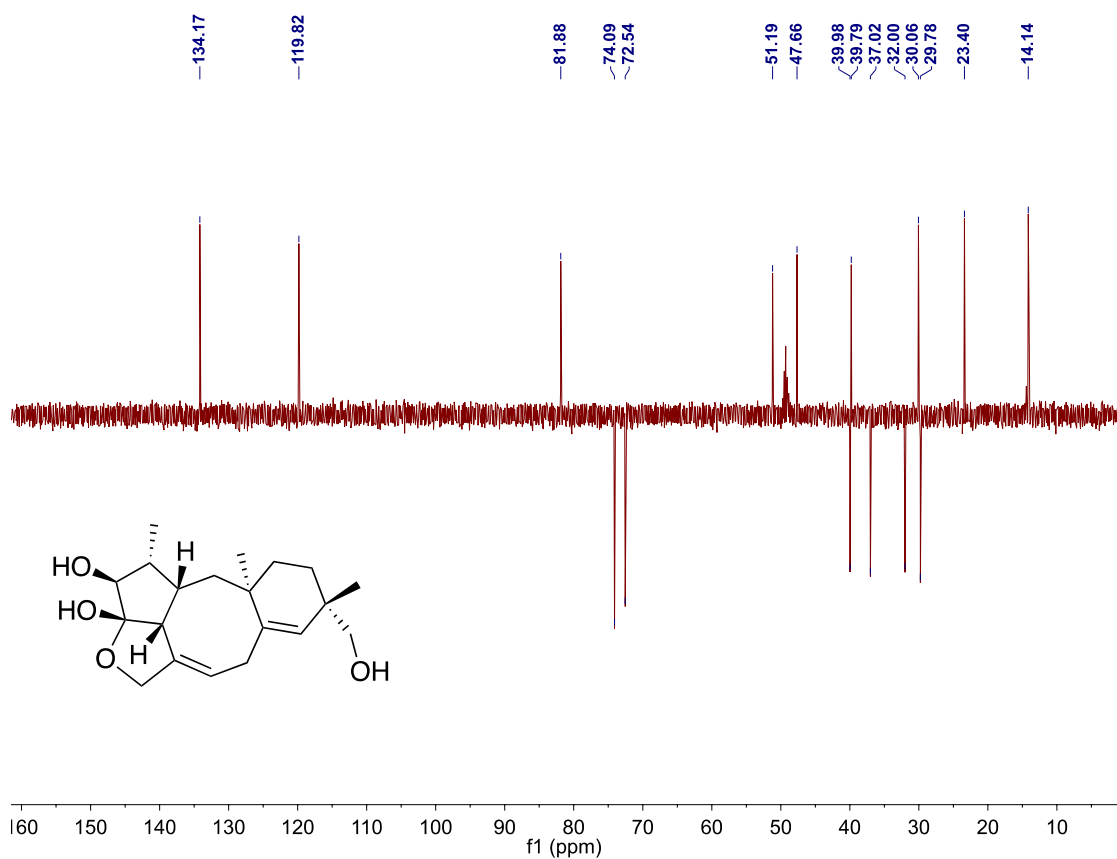

**Figure S33.** DEPT spectrum of talaronid D (**4**) in  $\text{CD}_3\text{OD}$

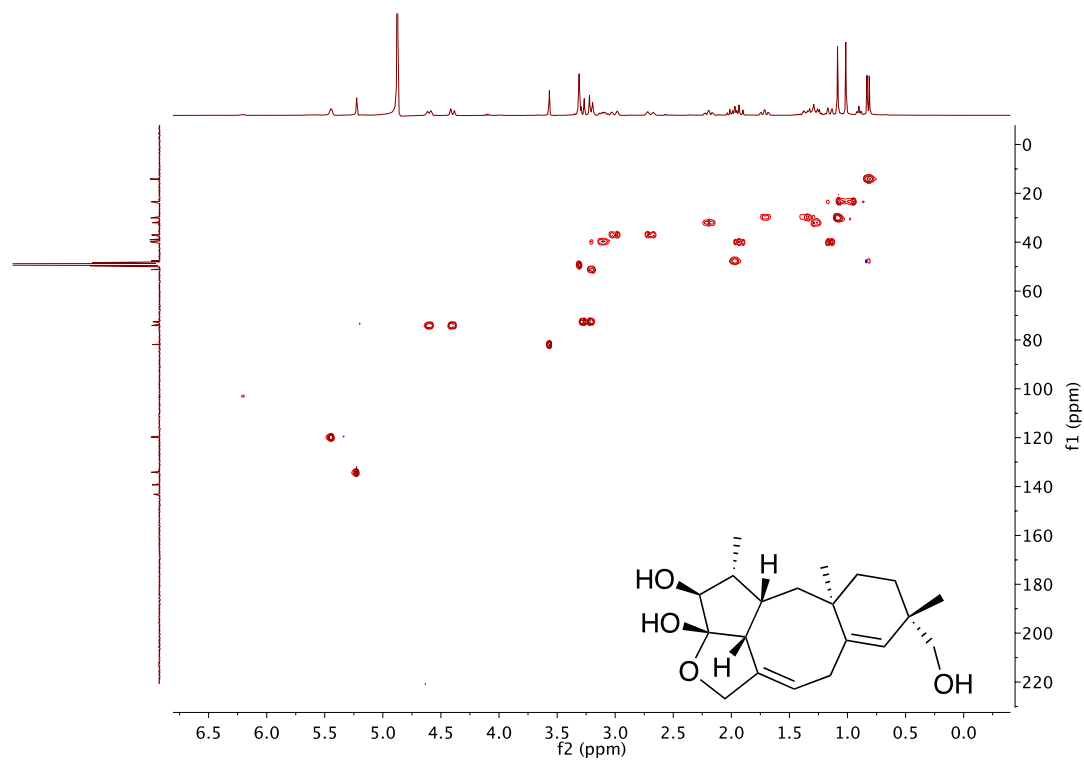

**Figure S34.** HSQC spectrum of talaronid D (**4**) in CD<sub>3</sub>OD

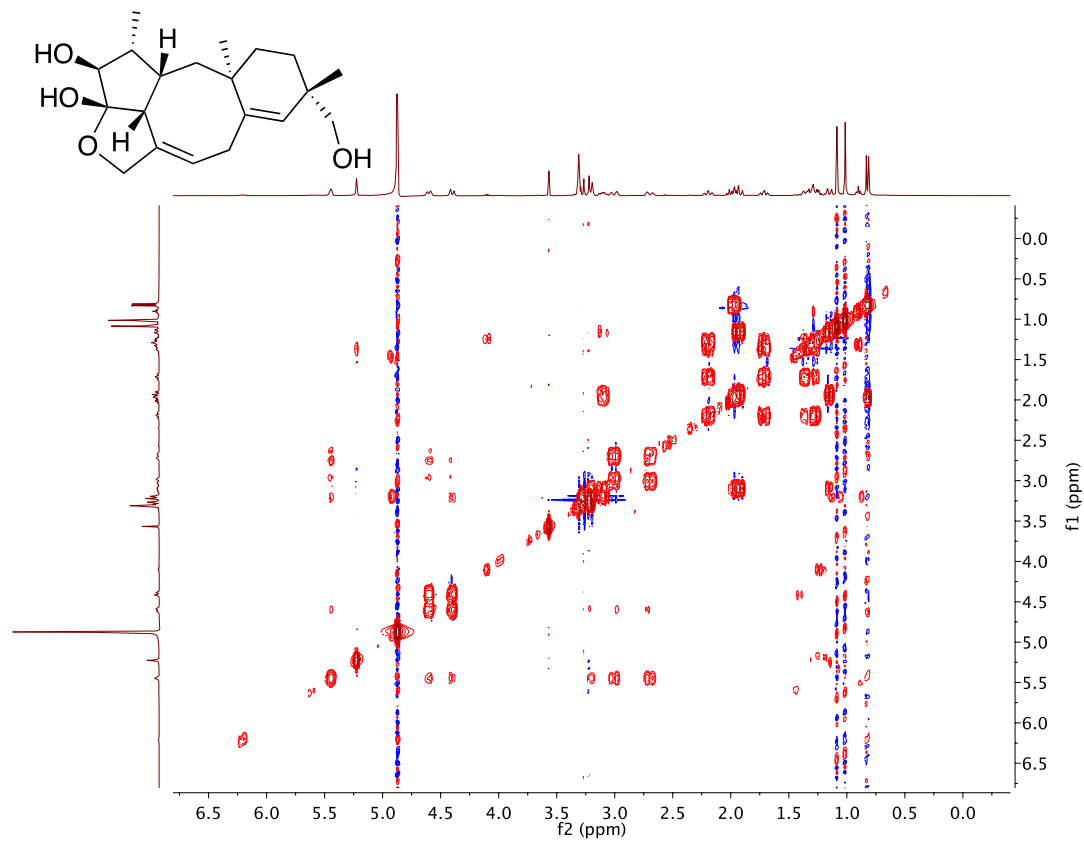

**Figure S35.** <sup>1</sup>H-<sup>1</sup>H COSY spectrum of talaronid D (**4**) in CD<sub>3</sub>OD

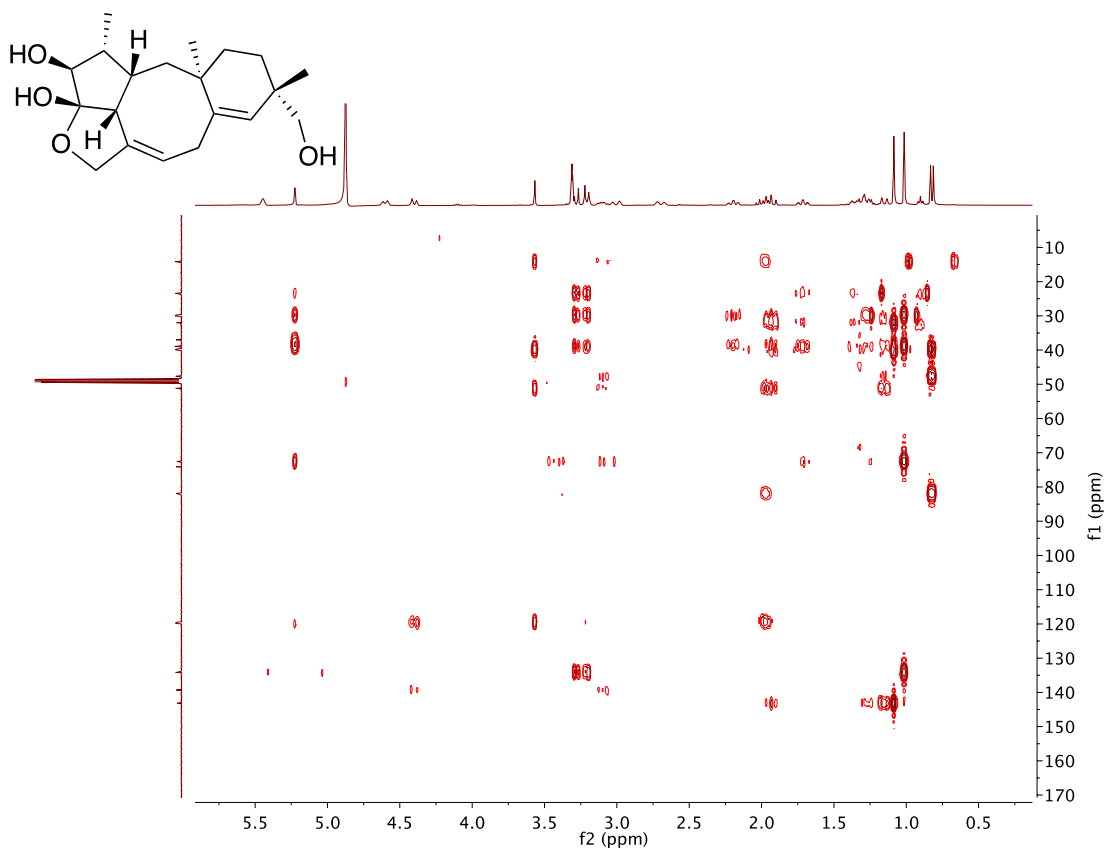

Figure S36. HMBC spectrum of talaronid D (4) in CD<sub>3</sub>OD

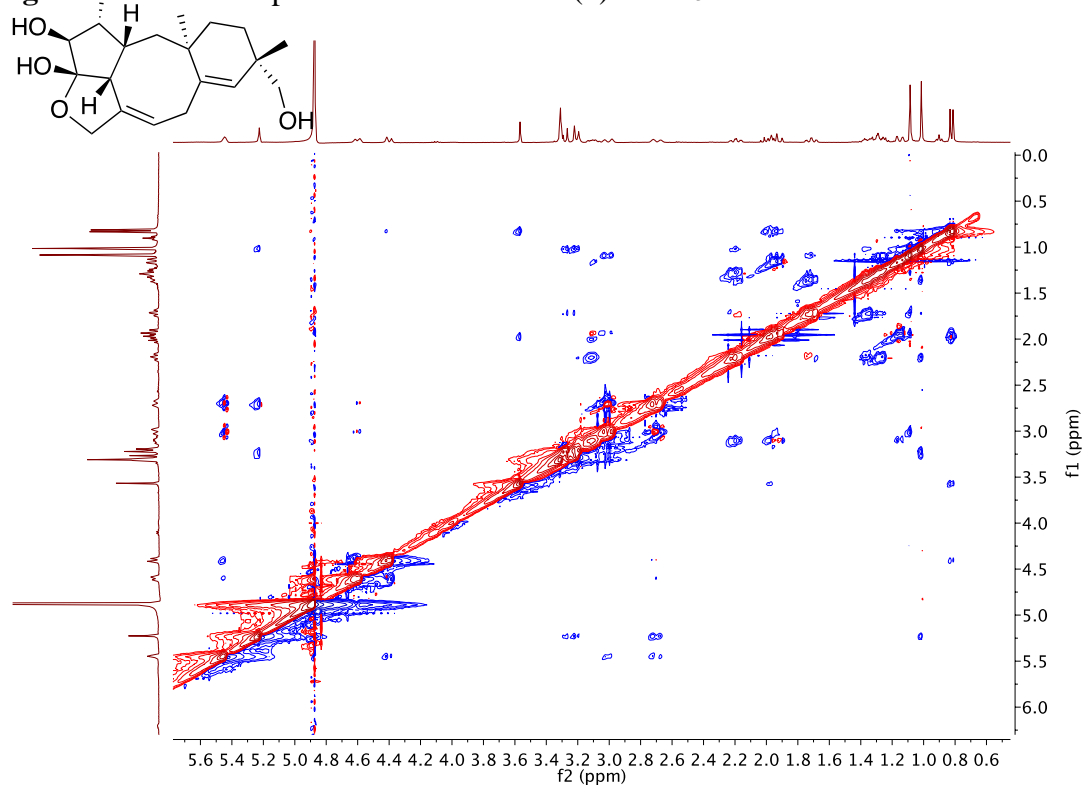

Figure S37. NOESY spectrum of talaronid D (4) in CD<sub>3</sub>OD

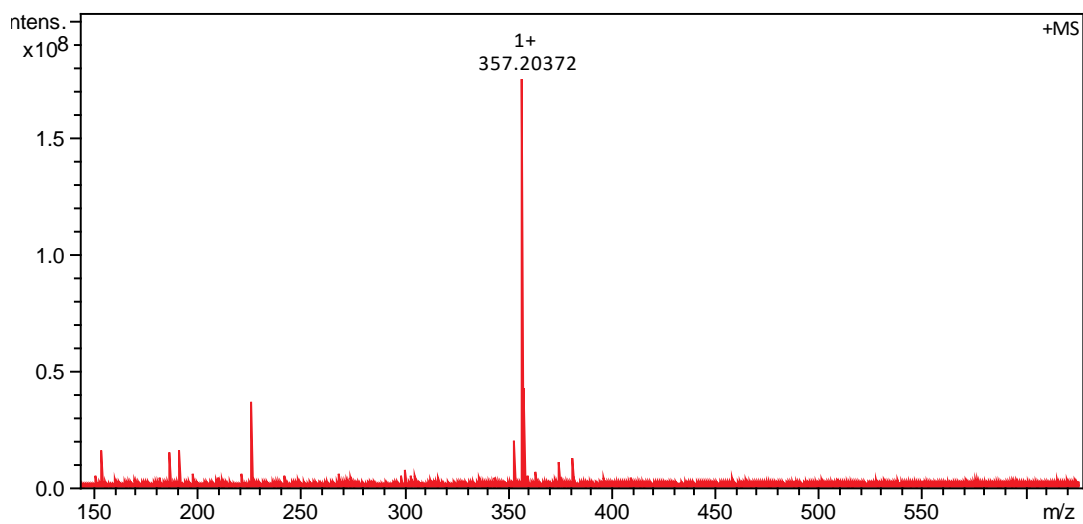

**Figure S38.** (+) ESI-MS spectrum of talaronid D (4)

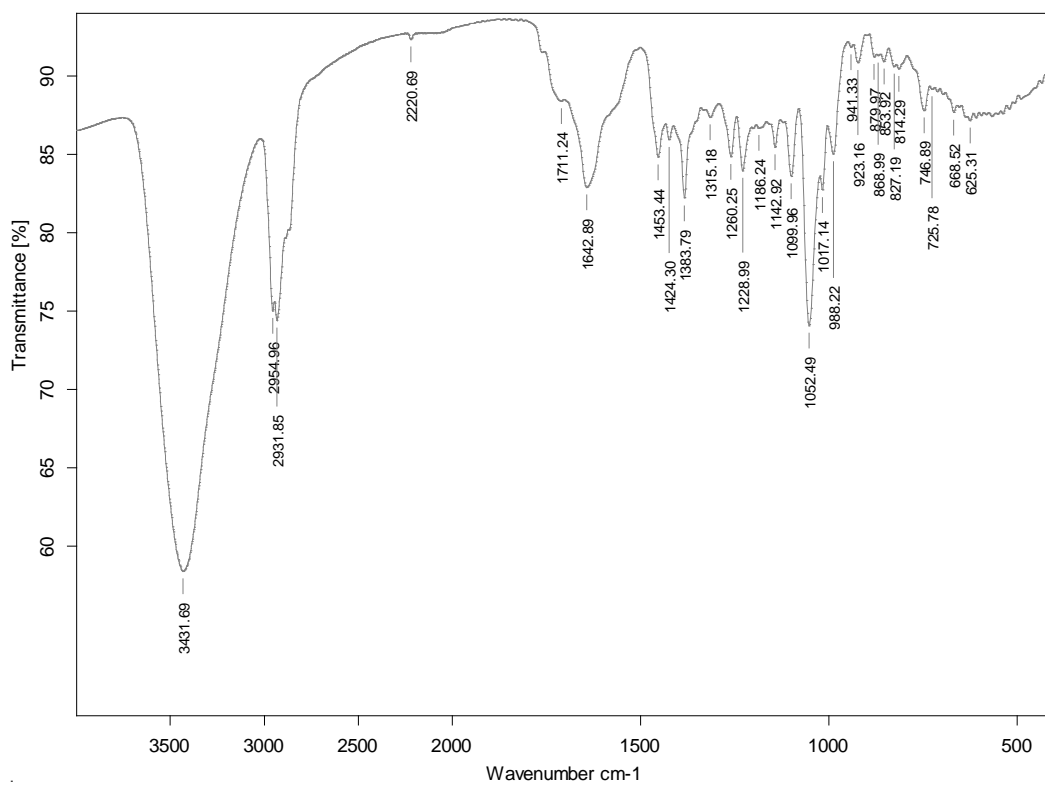

**Figure S39.** IR spectrum of talaronid D (4)

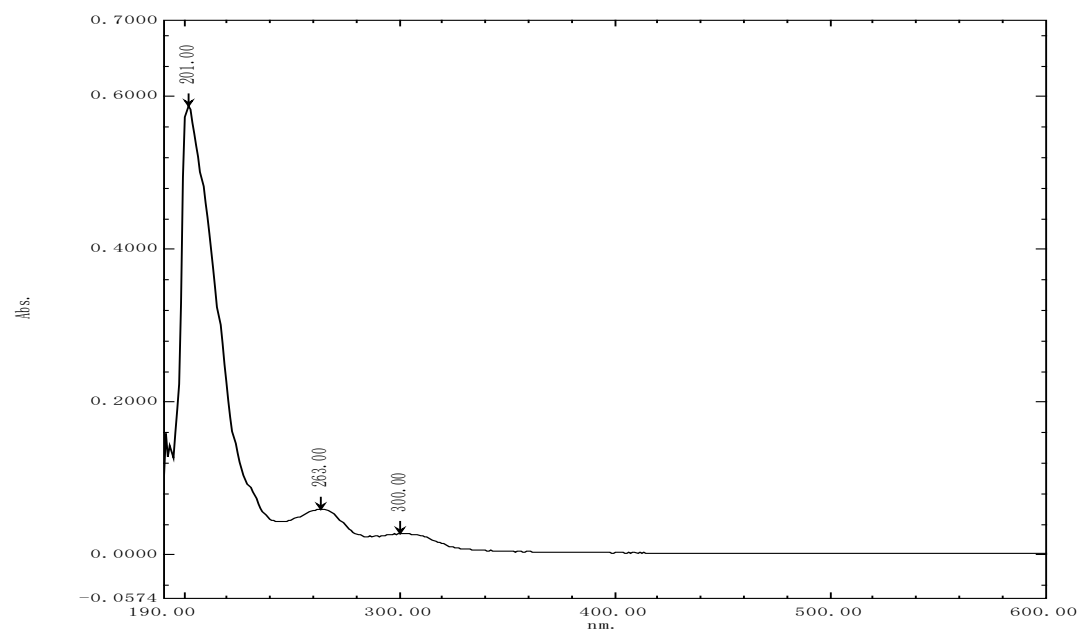

**Figure S40.** UV spectrum of talaronid D (**4**)
